1           **Leukemia cell of origin influences apoptotic priming and sensitivity to LSD1 inhibition**

2

3 Sheng F. Cai<sup>1,2</sup>, S. Haihua Chu<sup>3</sup>, Aaron D. Goldberg<sup>2</sup>, Salma Parvin<sup>4</sup>, Richard P. Koche<sup>5</sup>, Jacob L.  
4 Glass<sup>2</sup>, Eytan M. Stein<sup>2</sup>, Martin S. Tallman<sup>2</sup>, Filiz Sen<sup>6</sup>, Christopher Famulare<sup>2</sup>, Monica Cusan<sup>7</sup>,  
5 Chun-Hao Huang<sup>8</sup>, Chun-Wei Chen<sup>9</sup>, Lihua Zou<sup>5,10</sup>, Keith B. Cordner<sup>1</sup>, Nicole L. DelGaudio<sup>1</sup>,  
6 Vidushi Durani<sup>1</sup>, Mitali Kini<sup>1</sup>, Madison Rex<sup>1</sup>, Helen S. Tian<sup>1</sup>, Johannes Zuber<sup>11</sup>, Timour Baslan<sup>8</sup>,  
7 Scott W. Lowe<sup>8,12</sup>, Hugh Y. Rienhoff, Jr.<sup>13</sup>, Anthony Letai<sup>4</sup>, Ross L. Levine<sup>1,2,14\*</sup>, Scott A.  
8 Armstrong<sup>3,14\*</sup>

9

10 <sup>1</sup>Human Oncology & Pathogenesis Program, Memorial Sloan Kettering Cancer Center, New  
11 York, NY, USA. <sup>2</sup>Leukemia Service, Department of Medicine, and Center for Hematologic  
12 Malignancies, Memorial Sloan Kettering Cancer Center, New York, NY, USA. <sup>3</sup>Department of  
13 Pediatric Oncology, Dana-Farber Cancer Institute and Division of Hematology/Oncology, Boston  
14 Children's Hospital, Harvard Medical School, Boston, MA, USA. <sup>4</sup>Department of Medical  
15 Oncology, Dana-Farber Cancer Institute, Harvard Medical School, Boston, MA, USA. <sup>5</sup>Center for  
16 Epigenetics Research, Memorial Sloan Kettering Cancer Center, New York, NY, USA.  
17 <sup>6</sup>Hematopathology Diagnostic Service, Department of Pathology, Memorial Sloan Kettering  
18 Cancer Center, New York, NY, USA. <sup>7</sup>University Hospital, Ludwig Maximilian University Munich,  
19 Munich, Germany. <sup>8</sup>Cancer Biology and Genetics Program, Memorial Sloan Kettering Cancer  
20 Center, New York, NY, USA. <sup>9</sup>Department of Systems Biology, Beckman Research Institute, City  
21 of Hope, Duarte, CA, USA. <sup>10</sup>Current Address: Department of Biochemistry and Molecular  
22 Genetics, Northwestern University Feinberg School of Medicine, Chicago, IL, USA. <sup>11</sup>Research  
23 Institute of Molecular Pathology (IMP), Vienna, Austria. <sup>12</sup>Howard Hughes Medical Institute,  
24 New York, NY, USA. <sup>13</sup>Imago Biosciences, Inc., San Francisco, CA, USA.

25

26 <sup>14</sup>These corresponding authors jointly supervised this work: Ross L. Levine and Scott A.  
27 Armstrong.           \*e-mail:           leviner@mskcc.org;           Scott\_Armstrong@dfci.harvard.edu

## Summary

1  
2  
3  
4  
5  
6  
7  
8  
9  
10  
11  
12  
13  
14  
15  
16  
17  
18  
19  
20

Previous studies have established that the cell of origin of oncogenic transformation is a determinant of therapeutic sensitivity. However, the mechanisms governing cell-of-origin-driven differences in therapeutic response have not been delineated. Leukemias initiating in hematopoietic stem cells (HSC) are less sensitive to cytotoxic chemotherapy and express high levels of the transcription factor *Evi1* compared to leukemias derived from myeloid progenitors. Here, we compared drug sensitivity and expression profiles of murine and human leukemias initiated in either HSCs or myeloid progenitors to reveal a novel function for *Evi1* in modulating p53 protein stability and activity. HSC-derived leukemias exhibit decreased apoptotic priming, attenuated p53 transcriptional output, and resistance to lysine-specific demethylase 1 inhibitors in addition to classical genotoxic stresses. p53 loss-of-function in *Evi1*<sup>low</sup> progenitor-derived leukemias induces resistance to LSD1 inhibition. By contrast, *Evi1*<sup>high</sup> leukemias are sensitized to LSD1 inhibition by the BH3 mimetic venetoclax, resulting in enhanced apoptosis and greater reductions in disease burden. Our findings demonstrate a cell-of-origin determined novel role for *EVI1* in p53 wild-type cancers in reducing p53 function and provide a strategy to circumvent drug resistance in high-risk, chemoresistant *EVI1*<sup>high</sup> AML.

1           Cancers arise through the acquisition of genetic alterations that transform normal cells  
2 into malignant clones. While the genetic drivers of cancer have been extensively described, the  
3 role of the cell of origin in malignant transformation is less well characterized. Previous studies  
4 established that epigenetic states conferred by cell of origin shape mutational profiles<sup>1</sup> and  
5 molecular classification across a diverse array of cancer subtypes<sup>2</sup>. Mouse models of acute  
6 myeloid leukemia (AML) provided evidence that manipulation of cell of origin through  
7 transformation of specific hematopoietic compartments can give rise to leukemias with distinct  
8 phenotypic features, though similar studies validating this in human AML with different cells of  
9 origin have not yet been reported. AML derived from hematopoietic stem cells (HSC), marked  
10 by high expression of the oncogenic transcription factor *Evi1*, exhibit higher disease penetrance,  
11 aggressiveness, and resistance to cytotoxic chemotherapy when compared to leukemias arising  
12 from more differentiated hematopoietic progenitor cells<sup>3-6</sup>. These findings correlate with  
13 clinical outcomes, as *EVI1* overexpression was the single prognostic factor associated with  
14 inferior overall survival among AML patients harboring *MLL* gene rearrangements<sup>7,8</sup>.

15           Here, we report that the cell of origin of leukemia initiation influences p53 activity and,  
16 in turn, apoptotic priming in both mouse and human models of AML. This differential p53  
17 activity is modulated at the level of protein abundance, with greater p53 protein expression in  
18 AML arising from granulocyte-monocyte progenitor (GMP) cells when compared to HSC-derived  
19 leukemias. We demonstrate that cell-of-origin-dependent p53 protein expression influences  
20 the differential sensitivity of these leukemias to genotoxic stresses including chemotherapy<sup>3-5</sup>  
21 and ionizing radiation, as well as to targeted epigenetic therapies that inhibit lysine-specific  
22 demethylase 1 (LSD1). LSD1 is a histone demethylase implicated in DNA damage responses and  
23 the p53 pathway<sup>9,10</sup> and is a therapeutic target in AML for which pharmacologic inhibitors are  
24 currently being investigated in early-phase clinical trials<sup>11-14</sup>. We also show that resistant *Evi1*<sup>high</sup>  
25 HSC-derived leukemias can be further sensitized by combining an LSD1 inhibitor with the BH3  
26 mimetic venetoclax. Taken together, our findings comparing leukemias arising from different  
27 cells of origin led us to discover that the transcription factor *Evi1* can modulate p53 activity in  
28 p53 wild-type cancer cells to modulate drug sensitivity, and we identified a therapeutic

1 combination that can elicit durable clinical responses in chemoresistant high-risk *EVI1*-  
2 rearranged AML.

3

#### 4 **Results**

5 **HSC- and GMP-derived leukemias exhibit differential sensitivity to LSD1 inhibition.** To  
6 investigate whether cell of origin of leukemic transformation influences sensitivity to LSD1  
7 inhibition, MLL-AF9 was expressed in murine lineage<sup>-</sup>Sca1<sup>+</sup>Kit<sup>+</sup> (LSK) HSCs or GMPs followed by  
8 transplantation into recipient mice. GFP<sup>+</sup> leukemic blasts were harvested from bone marrow of  
9 moribund recipient mice and grown in culture. Consistent with previously published reports<sup>3-5</sup>,  
10 LSK-derived murine MLL-AF9 (LSK-MLL-AF9) leukemias were more resistant to doxorubicin  
11 exposure when compared to GMP-derived (GMP-MLL-AF9) leukemias (**Supp. Figure 1a**). The  
12 leukemias arising from different cells of origin exhibited identical baseline steady-state growth  
13 kinetics (**Supp. Figure 1b**), doubling times (**Supp. Figure 1c**), and similar levels of MLL-AF9  
14 mRNA expression (**Supp. Figure 1h**). However, treatment with the irreversible LSD1 inhibitor  
15 IMG-7289 revealed marked differences in sensitivity between LSK- and GMP-MLL-AF9 with  
16 separation by at least 2 logs in IC<sub>50</sub> values (**Figure 1a, Supp. Figure 1d**). This differential  
17 sensitivity to IMG-7289 was not abrogated by extended treatment duration for as long as 15  
18 days (**Supp. Figure 1d**). We observed similar differential sensitivity to an additional irreversible  
19 LSD1 inhibitor, IMG-98 (**Supp. Figure 1e**), suggesting that this phenotype is not attributable to  
20 off-target effects. By contrast, pharmacologic inhibition of the H3K79 methyltransferase DOT1L,  
21 a known therapeutic vulnerability in MLL-rearranged AML, did not reveal differential sensitivity  
22 based on cell of origin (**Supp. Figure 1f**). To test if differential sensitivity to LSD1 inhibition is  
23 observed *in vivo*, we transplanted primary LSK- and GMP-MLL-AF9 leukemias into secondary  
24 recipients and treated mice via oral gavage with either vehicle control or IMG-7289 (25 mg/kg)  
25 for a 14-day period, after which the mice were monitored for survival. While recipient mice  
26 engrafted with GMP-MLL-AF9 leukemias exhibited a treatment effect with prolongation of  
27 median survival in IMG-7289-treated mice (26 days control vs 33.5 days IMG-7289, p=0.0007,  
28 **Figure 1b**), there was no prolongation of median survival in recipient mice transplanted with

1 LSK-MLL-AF9 leukemias (**Figure 1c**). These findings suggest that cell of origin of leukemic  
2 transformation affects sensitivity to LSD1 inhibition *in vivo* and *in vitro*.

3 LSK- and GMP-MLL-AF9 leukemias can be discerned by differential expression of the  
4 oncogenic transcription factor *Evi1*, with LSK- MLL-AF9 leukemias having significantly higher  
5 *Evi1* mRNA abundance relative to GMP-MLL-AF9 leukemias<sup>3-6</sup> (**Figure 1d**). Differential *Evi1*  
6 expression is also observed in the normal LSK and GMP compartments<sup>15</sup>. Kataoka et al.  
7 generated a mouse model in which GFP is knocked into the endogenous locus to allow for the  
8 tracking of *Evi1* expression in different hematopoietic compartments<sup>15</sup>. *Evi1* is most highly  
9 expressed in long-term HSCs (LT-HSCs), and mice heterozygous for *Evi1* had reduced LT-HSC  
10 self-renewal which can be rescued by restoration of *Evi1* expression. Importantly, this GFP  
11 reporter mouse showed that *Evi1* expression was highly restricted to the LSK fraction with  
12 approximately half of the cells in this population expressing GFP. In contrast, virtually no GFP  
13 reporter activity was detectable in the GMP and MEP compartments. *EVI1* expression level in  
14 AML patients harboring *MLL* gene rearrangements has prognostic value, such that *EVI1*<sup>high</sup> *MLL*-  
15 rearranged AML patients had inferior overall survival, relapse-free survival, and event-free  
16 survival<sup>7</sup>. These data are consistent with the hypothesis that prognostic subtypes of human  
17 AML can be modeled based on different cells of origin, however this has not been investigated  
18 in a human AML model system. To that end, we employed validated human  
19 immunophenotypes<sup>16-18</sup> to sort-purify CD34-selected populations of CD34<sup>+</sup>CD38<sup>-</sup> enriched  
20 human HSCs (hHSC) and CD34<sup>+</sup>CD38<sup>+</sup>CD110<sup>-</sup>CD45RA<sup>+</sup> human GMP (hGMP) from umbilical cord  
21 blood. These populations were then transduced with the MLL-AF9 oncogene and transplanted  
22 into sublethally irradiated NOD/SCID/IL-2Rg<sub>c</sub>-null (NSG) mice to generate primary human cord  
23 blood-derived MLL-AF9 leukemias. Moribund mice engrafted with high-burden (uniformly  
24 >98%) CD33<sup>+</sup>GFP<sup>+</sup> myeloid blasts in the bone marrow (**Supp. Figure 1g**), regardless of cell of  
25 origin (hGMP or hHSC). Similar to murine MLL-AF9 leukemias, *EVI1* mRNA abundance in hHSC-  
26 derived leukemias was higher than *EVI1* transcript levels in hGMP-derived leukemias, and this  
27 expression pattern in the leukemias is seen in the corresponding normal human hematopoietic  
28 compartments (**Figure 1e**).

1           Given that differential *Evi1* expression in MLL-AF9 leukemias arising from enriched HSC  
2 and GMP populations is observed in the non-malignant stem/progenitor compartments prior to  
3 retroviral transduction, we hypothesized that *Evi1* expression levels would correlate with an  
4 activated or repressive epigenetic state of the cell of origin prior to oncogenic transformation.  
5 The importance of trimethylation of lysine 27 on histone H3 (H3K27me3) as a repressive  
6 chromatin mark in regulating gene expression changes during hematopoietic differentiation  
7 was previously demonstrated via genetic approaches<sup>19</sup> and genome-wide studies of histone  
8 modifications<sup>20</sup>. We performed H3K27me3 chromatin immunoprecipitation with high-  
9 throughput sequencing (ChIP-seq) analysis of three independent murine LSK-derived MLL-AF9  
10 leukemias and three independent GMP-derived leukemias. We also resourced publicly available  
11 H3K27me3 ChIP-seq data from normal murine LSK and GMP populations<sup>21</sup>. Concordant with the  
12 expression data, the transcriptional start site (TSS) of *Evi1* in both normal mouse GMPs and  
13 GMP-derived leukemias were marked by H3K27me3 (**Figure 1f**). In contrast, mouse LSKs and  
14 LSK-derived MLL-AF9 leukemias did not show H3K27me3 enrichment at the TSS of the *Evi1*  
15 locus, suggesting that *Evi1* is Polycomb-repressed in GMPs and GMP-MLL-AF9 leukemias but  
16 not in LSKs or LSK-MLL-AF9 leukemias. To determine if differential occupancy of the *EVI1* locus  
17 by H3K27 trimethylation is also observed in human AML, we performed H3K27me3 ChIP-seq  
18 and RNA-seq on primary *MLL*-rearranged AML patient samples. *Evi1*<sup>high</sup> *MLL*-rearranged AML  
19 samples were not marked by H3K27me3 throughout the *EVI1* gene locus, whereas *Evi1*<sup>low</sup>  
20 patient samples were characterized by H3K27 trimethylation (**Figure 1g**).

21           Previous studies<sup>6,22</sup> have shown that knockdown of *Evi1* in both mouse and human  
22 leukemia cells enhanced sensitivity to cytotoxic chemotherapy and other pro-apoptotic agents.  
23 To determine if perturbation of *Evi1* expression in LSK-MLL-AF9 leukemia cells is able to  
24 sensitize these cells to LSD1 inhibition, we attenuated *Evi1* expression in LSK-derived AML cells.  
25 Two independent shRNA constructs targeting the *Evi1* locus achieved knockdown of greater  
26 than 80% relative to non-targeting control shRNAs (**Figure 1h-i**). Consistent with prior reports,  
27 *Evi1* knockdown resulted in sensitization to cytotoxic stressors and pro-apoptotic stimuli, such  
28 as doxorubicin (**Figure 1j**), ionizing radiation (**Figure 1k**), and the BH3 mimetic venetoclax (**Supp.**  
29 **Figure 1i**). We found that *Evi1* knockdown using these independent shRNA constructs

1 significantly reduced the IMG-7289 IC<sub>50</sub> by 34-fold and 7.5-fold for *Evi1* shRNAs #1 and #2,  
2 respectively (**Figure 1I**). These findings show that the relative sensitivity to LSD1 inhibition  
3 observed between LSK- and GMP-derived MLL-AF9 murine leukemias is conferred in part by  
4 differential expression of *Evi1*.

5  
6 **HSC- and GMP-derived leukemias exhibit differential apoptotic priming.** To understand the  
7 physiological basis for how GMP-MLL-AF9 leukemias are more sensitive to LSD1 inhibition than  
8 LSK-MLL-AF9 leukemias, we treated these cells with a fixed concentration of IMG-7289 (1 μM),  
9 where the greatest sensitivity threshold between GMP-MLL-AF9 and LSK-MLL-AF9 leukemias  
10 was observed (**Figure 1a**), which resulted in a reduction in viable cell counts for GMP-MLL-AF9  
11 cells but not LSK-MLL-AF9 cells (**Figure 2a**). GMP-derived leukemia cells exhibited greater  
12 Annexin V staining after IMG-7289 treatment, whereas no such increase in apoptotic cells was  
13 observed in LSK-MLL-AF9 cells treated with IMG-7289 (**Figure 2b**). During apoptotic cell death,  
14 loss of mitochondrial transmembrane potential ( $\psi$ ) occurs before typical morphologic changes  
15 associated with apoptosis are observed and also before translocation of phosphatidylserine to  
16 the external portion of the cell membrane<sup>23,24</sup>, and this loss of potential can be measured by  
17 loss of fluorescence in tetramethylrhodamine ethyl ester (TMRE) stained cells. Loss of TMRE  
18 fluorescence was seen in GMP-MLL-AF9 cells following treatment with 1 μM IMG-7289 for 48  
19 hours, represented as an increased proportion of cells with  $\psi^{\text{low}}$  TMRE staining (**Figure 2c**). This  
20 phenotype was completely blunted in treated LSK-MLL-AF9 cells, with summary plots depicting  
21 the proportion of  $\psi^{\text{low}}$  cells in **Figure 2d**. The pro-apoptotic effects on MLL-AF9 leukemia cells  
22 observed with this class of tranylcypromine-derived LSD1 inhibitors has previously been shown  
23 by Harris et al. to closely phenocopy LSD1 knockdown by shRNA<sup>12</sup>.

24 In order to functionally interrogate apoptotic priming or triggering thresholds in our  
25 MLL-AF9 leukemias derived from murine and human HSCs or GMPs, we employed BH3  
26 profiling, an experimental approach that probes the ability of unique peptides derived from  
27 BH3 domains of pro-apoptotic BH3-only protein family members to induce cytochrome *c*  
28 release as a readout of apoptosis induction in cells<sup>25,26</sup>. BH3 profiling demonstrates that  
29 apoptotic priming increases with myeloid differentiation<sup>27</sup>. The added utility of this assay is

1 that it allows for primary human umbilical cord blood hHSC- and hGMP-derived MLL-AF9  
2 leukemias, which cannot be passaged *in vitro*, to be functionally assessed for apoptotic priming.  
3 Murine GMP-derived MLL-AF9 leukemia cells exhibited a high degree of apoptotic priming as  
4 assessed by multiple pro-apoptotic peptides (e.g. BIM and MS1) and LSK-derived MLL-AF9  
5 leukemias are more blunted in their ability to trigger apoptosis in response to these same  
6 peptides (**Figure 2e, Supp. Figure 2a**). Similarly, human cord blood GMP-derived MLL-AF9  
7 primary leukemias exhibited a higher degree of priming across multiple peptides (e.g. PUMA  
8 and MS1), whereas hHSC-derived MLL-AF9 leukemias were more resistant to apoptosis  
9 induction (**Figure 2f, Supp. Figure 2b**).

10 To further explore the link between apoptotic priming and drug sensitivity, we  
11 hypothesized that perturbation of apoptotic priming via overexpression of Bcl-2 (**Supp. Figure**  
12 **3a**) in the more sensitive GMP-MLL-AF9 cells would induce resistance to LSD1 inhibition. GMP-  
13 MLL-AF9 cells overexpressing anti-apoptotic Bcl-2 exhibited blunted apoptotic response to a  
14 variety of pro-apoptotic peptides relative to cell expressing empty vector control (**Supp. Figure**  
15 **3b**). Bcl-2-overexpressing cells also had higher IC<sub>50</sub> upon treatment with IMG-7289 in growth  
16 inhibition assays, but also exhibited greater resistance to suppression of viable cell growth by  
17 doxorubicin. Together, these data suggest that apoptotic priming underlies the differential  
18 sensitivity to LSD1 inhibition and to chemotherapy seen in LSK- and GMP-derived MLL-AF9  
19 leukemias.

20  
21 **Cell of origin of leukemic transformation influences p53 protein stability in an Evi1-dependent**  
22 **manner.** We next investigated the mechanisms that govern cell of origin-specific sensitivity to  
23 LSD1 inhibition and differential apoptotic priming. We first conducted a chromatin regulator-  
24 focused shRNA screen in murine LSK-derived MLL-AF9 leukemia cells. A library comprised of  
25 2,252 shRNAs targeting 468 known chromatin regulators was constructed in a TRMPV-Neo  
26 backbone and transduced as a single pool into Tet-on-competent, monoclonal mouse LSK-  
27 derived MLL-AF9 leukemia cells. After neomycin (G418) selection, shRNA expression was  
28 induced upon treatment with doxycycline. shRNA-expressing cells were then sorted, and  
29 changes in shRNA library representation after 6 days of treatment with IMG-7289 were



1 assessed by high-throughput sequencing of shRNA guide strands as previously described<sup>28</sup>.  
2 Mean log<sub>2</sub>-fold change in shRNA representation comparing IMG-7289-treated vs day 0  
3 untreated cells was plotted in rank order, revealing both depleted and enriched shRNAs in IMG-  
4 7289-treated cells (**Supp. Table 1**). Among the shRNAs most highly enriched after IMG-7289  
5 treatment was an shRNA targeting p53, suggesting that p53 knockdown can mediate resistance  
6 to LSD1 inhibition (**Figure 3a**). Additional shRNA hits that were enriched with LSD1 inhibitor  
7 treatment included p53 pathway components *Gadd45a*, *Csnk2a*, *Smyd2*, and *Bmi1* (**Supp. Table**  
8 **1**). *Gadd45a* is a well-known direct transcriptional target of p53 that mediates cell cycle arrest  
9 and apoptosis, and *Csnk2a1* has also been shown to be required for p53-mediated apoptosis<sup>29</sup>.  
10 In contrast, two independent shRNAs targeting the transcriptional regulator *Cdk9* were  
11 depleted in the IMG-7289-treated cells relative to DMSO with log<sub>2</sub> fold change of -0.914 and -  
12 0.4105, suggesting that loss of *Cdk9* enhances sensitivity to LSD1 inhibition. Other groups have  
13 previously demonstrated that attenuation of *Cdk9* in MLL-AF9 cells induces apoptosis<sup>30</sup>.

14 We also performed RNA-seq analysis comparing the transcriptomes of murine LSK- and  
15 GMP-derived MLL-AF9 leukemias under untreated, steady-state conditions. Using gene set  
16 enrichment analysis (GSEA), we found that among the gene sets most positively enriched in  
17 LSK-derived MLL-AF9 leukemias (i.e. P53\_DN.V1\_UP) was one defined by p53-mutant NCI-60  
18 cell lines compared to p53-wild type cell lines (**Figure 3b, left panel**)<sup>31</sup>. We also identified a gene  
19 set enriched in GMP-derived murine leukemias (**Figure 3b, right panel**) previously defined by  
20 expression of primary canonical p53 target genes<sup>32</sup> (KANNAN\_TP53\_TARGETS\_UP), which  
21 suggests that GMP-derived MLL-AF9 leukemias have higher basal transcription of canonical p53  
22 target genes. Indeed, when represented as a heat map (**Figure 3c**), primary p53 target genes  
23 are more highly transcribed in the 3 independent GMP-derived leukemias compared to 3  
24 independent LSK-derived leukemias. Importantly, we confirmed that these LSK-MLL-AF9 and  
25 GMP-MLL-AF9 genomes harbored wild-type p53 alleles without copy-number alterations by  
26 using targeted sequencing (**Supp. Figure 2c-d**) as well as low-pass whole genome sequencing  
27 (**Supp. Figure 2e**) approaches<sup>33</sup>. We next analyzed RNA-seq AML data from TCGA<sup>34</sup>. Out of the  
28 179 primary AML samples that were analyzed by RNA-seq, only 4 patient samples harbored  
29 MLL gene rearrangements, and 3 of these 4 samples were *EVI1*<sup>high</sup> and 1 was *EVI1*<sup>low</sup>. For this

1 reason, we instead ranked all 179 TCGA AML patient samples in order of normalized *EVI1*  
2 expression level. From this rank list, we compared the 27 AML samples with the highest *EVI1*  
3 expression to the 27 samples with the lowest abundance of *EVI1* mRNA and applied GSEA to  
4 these cohorts. Importantly, while MLL-rearranged AML were observed in both *EVI1*<sup>high</sup> and  
5 *EVI1*<sup>low</sup> groups, there were a variety of other AML subtypes represented within this analysis,  
6 including but not limited to inversion(16), t(8;21), complex karyotype, NUP98-rearranged AML,  
7 t(17;19), t(3;5), and normal karyotype-AML. The same p53 gene set (i.e. P53\_DN.V1\_UP) as  
8 noted above had positive enrichment within *Evi1*<sup>high</sup> AML samples of genes compared to *Evi1*<sup>low</sup>  
9 AML samples (**Figure 3b, center panel**). These findings suggest that the transcriptional profiles  
10 of primary AML patient samples, when segregated based on *EVI1* expression level irrespective  
11 of the presence or absence of MLL gene rearrangements, recapitulate the differential p53-  
12 related gene expression profiles observed in murine MLL-AF9 leukemias based on differential  
13 cells of origin. In addition, these data suggest that the p53 mediated gene expression program  
14 may be modulated by differential *Evi1* expression.

15 We next assessed p53 activity with a focus on transcriptional activation of pro-apoptotic  
16 targets downstream of p53 in the setting of LSD1 inhibitor treatment. LSK- and GMP-MLL-AF9  
17 leukemias were treated with IMG-7289 for 48 hours, after which quantitative real-time  
18 polymerase chain reaction (qRT-PCR) was performed to assess mRNA abundance of the pro-  
19 apoptotic p53 target genes, *Bax* and *Noxa* (**Figure 3d**). IMG-7289 treatment of GMP-derived,  
20 but not LSK-derived, MLL-AF9 leukemia cells resulted in significant upregulation of *Bax* and  
21 *Noxa* expression relative to control. To assess whether upregulation of these target genes was  
22 p53-dependent in GMP-derived leukemias, we generated primary GMP-derived MLL-AF9  
23 leukemias from p53-knockout mice and found that loss of p53 in GMP-derived leukemias  
24 abrogated IMG-7289-induced upregulation of *Bax* and *Noxa*. Upregulation of p21 was seen  
25 after IMG-7289 treatment in both GMP- and LSK-derived leukemias, as well as in p53-null GMP-  
26 derived leukemias (**Supp. Figure 2f**), as p53-independent activation of p21 has been  
27 described<sup>35,36</sup>. These data suggest that the transcriptional output of pro-apoptotic p53 target  
28 genes is greater in GMP-derived leukemias than in LSK-derived leukemias.

1           We hypothesized that the increased p53 transcriptional output seen in GMP-derived  
2 MLL-AF9 leukemias could be due to increased p53 protein abundance in GMP-MLL-AF9 cells  
3 relative to LSK-MLL-AF9 cells and/or increased chromatin occupancy of p53 in GMP-MLL-AF9  
4 cells when compared to LSK-derived leukemias. To test the first possibility, two independent  
5 GMP-MLL-AF9 and two independent LSK-MLL-AF9 cells were treated with DMSO or IMG-7289,  
6 and whole cell extracts were subjected to Western blot analysis for p53 protein abundance  
7 (**Figure 3e**). Comparison of p53 protein abundance in DMSO control lanes revealed higher basal  
8 levels of p53 protein expression in GMP-MLL-AF9 cells compared to LSK-MLL-AF9 cells.  
9 Furthermore, treatment with IMG-7289 revealed further stabilization of p53 protein in GMP-  
10 MLL-AF9 cells, which was not observed in IMG-7289-treated LSK-MLL-AF9 cells. Extended  
11 exposure times revealed that p53 protein was indeed detectable in LSK-MLL-AF9 cells, but p53  
12 protein stabilization remained blunted in these cells even after IMG-7289 treatment (**Supp.**  
13 **Figure 2g**). Similarly, Western blot analysis revealed greater p53 protein abundance in hGMP-  
14 MLL-AF9 cells (**Figure 3f**). Importantly, under the same IMG-7289 treatment conditions that  
15 caused induction of p53 protein expression in GMP-MLL-AF9 cells, no increase in p53 mRNA  
16 expression was seen in either GMP-MLL-AF9 or LSK-MLL-AF9 leukemia cells, suggesting that  
17 IMG-7289-induced p53 protein stabilization is post-transcriptionally regulated (**Figure 3g**). In  
18 fact, treatment with LSD1 inhibitor resulted in relatively fewer p53 mRNA transcripts, which  
19 may potentially be explained by selection for viable cells with less p53 activity over the course  
20 of exposure to IMG-7289.

21           Multiple cellular stresses can induce p53 protein stabilization via disruption of the  
22 interaction between p53 and Mdm2, the E3 ubiquitin ligase targets p53 for proteasomal  
23 degradation. The DNA damage response is one cellular stress that can induce p53 activation  
24 and stabilization. To detect differences in DNA damage response between LSK-MLL-AF9 and  
25 GMP-MLL-AF9 cells, we performed 6-hour time course during which these cells were treated  
26 with 1  $\mu$ M IMG-7289 and then cell lysates were harvested for Western blot analysis to detect  
27 gamma-H2AX induction with 0, 1, 3, and 6 hours of exposure to LSD1 inhibitor (**Supp. Figure 3f**).  
28 We observed greater amounts of gamma-H2AX at 0, 1, and 3 hours post-treatment with IMG-  
29 7289 in GMP-MLL-AF9 cells relative to LSK-MLL-AF9 cells. Next, we treated NIH-3T3 cells

1 expressing either murine Evi1 or empty vector with increasing concentrations of the  
2 proteasomal inhibitor bortezomib in order to block the degradation of ubiquitinated p53. If Evi1  
3 were influencing p53 protein stability at the level of the proteasome or at the ubiquitination  
4 step for p53, we would expect that Evi1-overexpressing cells treated with bortezomib would  
5 have greater accumulation of mono- or poly-ubiquitinated species of p53 (**Supp. Figure 3g**).  
6 Notably, while bortezomib treatment did reveal higher molecular weight modified p53 species  
7 detectable by Western blot analysis, Evi1 overexpression in NIH-3T3 cells did not alter the  
8 abundance of these species when compared to empty vector-transduced cells. These data  
9 suggest that, while the DNA damage response upstream of the p53 pathway may be influenced  
10 by cell of origin, Evi1 overexpression did not alter proteasome-dependent stability of p53,  
11 suggesting Evi1 modulates p53 stability via a proteasome-independent mechanism.

12 Analysis of the TCGA AML samples (**Figure 3b, center panel**), together with the negative  
13 correlation between *Evi1* expression level and p53 protein abundance, led us to hypothesize  
14 that *Evi1* functions as an upstream modulator of p53 protein stability. Knockdown of *Evi1* in  
15 LSK-MLL-AF9 cells resulted in increased p53 protein expression relative to non-targeting shRNA  
16 control (**Figure 3h**). Moreover, NIH-3T3 cells expressing FLAG-Evi1 exhibited less p53 protein  
17 stabilization after treatment with doxorubicin when compared to cells transfected with empty  
18 vector (**Figure 3i**). We also treated LSK-MLL-AF9 cells with the MDM2 inhibitor RG7388 to  
19 induce p53 protein stabilization at levels comparable to GMP-MLL-AF9 cells (**Figure 3j**).  
20 Treatment with RG7388 was sufficient to restore LSD1 inhibitor sensitivity to LSK-MLL-AF9 cells  
21 (**Figure 3k**). These experiments demonstrate that cell of origin of leukemic transformation  
22 influences p53 protein stability in an Evi1-dependent manner.

23  
24 **Differential sensitivity of MLL-AF9 leukemias to LSD1 inhibition is determined by p53.** To  
25 determine if the abundance of p53 protein in LSK- and GMP-derived leukemias contributes to  
26 differential sensitivity to LSD1 inhibition, we knocked down p53 in GMP-MLL-AF9 cells and  
27 assessed for sensitivity to IMG-7289 treatment. When compared to non-targeting shRNA  
28 control, p53 knockdown in GMP-MLL-AF9 leukemias significantly enhanced resistance to IMG-  
29 7289 (**Figure 4a**). We then isolated normal GMPs from p53-knockout mice and used these cells

1 to generate MLL-AF9 primary leukemias. When compared to p53-wild type GMP-derived  
2 leukemias, p53-null GMP-derived leukemias were more resistant to IMG-7289 (**Figure 4b**).  
3 Knockdown with p53 shRNA – but not Renilla shRNA – in GMP-MLL-AF9 cells abrogated IMG-  
4 7289-induced mitochondrial depolarization assessed by TMRE staining (**Figure 4c-d**) as well as  
5 apoptosis induction by IMG-7289 treatment measured by Annexin V staining (**Figure 4e**).

6 One well-characterized consequence of LSD1 inhibition is induction of myeloid  
7 maturation or differentiation, which is associated with cell surface upregulation of the type I  
8 transmembrane protein, CD86<sup>11,37-40</sup>. To determine if perturbation of the p53 pathway affects  
9 LSD1 inhibitor-mediated upregulation of cell surface CD86 expression, we treated GMP-MLL-  
10 AF9 cells expressing shRNAs targeting either p53 or Renilla with IMG-7289 and measured cell  
11 surface induction of CD86. Knockdown of p53 in GMP-MLL-AF9 cells did not affect IMG-7289-  
12 induced CD86 upregulation measured by mean fluorescence intensity of CD86 staining (**Figure**  
13 **4f**). These data suggest that perturbation of p53 expression in GMP-MLL-AF9 cells is sufficient  
14 to induce resistance to the pro-apoptotic effects of IMG-7289 treatment but is insufficient to  
15 reverse the pro-differentiation effects of LSD1 inhibition, thereby functionally separating  
16 apoptosis induction and differentiation in response to LSD1 inhibition.

17 We hypothesized that the differential p53 activity seen in leukemias arising from  
18 distinct cells of origin would also result in differential sensitivity to other stimuli that trigger p53  
19 activation, as has been shown for cytotoxic chemotherapy such as doxorubicin<sup>3-5</sup>. GMP-MLL-  
20 AF9 and LSK-MLL-AF9 leukemia cells were exposed to ionizing radiation at a dose of 5 Gy and  
21 cultured for 24 hours post-irradiation, and viable cells were harvested and enumerated. LSK-  
22 MLL-AF9 leukemias were more resistant to ionizing radiation, with a greater number of viable  
23 cells counted post-irradiation when compared to GMP-MLL-AF9 leukemias (**Figure 4g**).  
24 Furthermore, this effect was p53-dependent, as p53 knockdown induced resistance to  
25 irradiation in GMP-derived leukemias. Taken together, these findings demonstrate that the pro-  
26 apoptotic effects of LSD1 inhibition, similar to other more classical genotoxic stresses (e.g.  
27 chemotherapy, ionizing radiation) are p53-dependent.

28 The observation that p53 activity can be modulated by Evi1 is also consistent with  
29 clinical data ascribing chemoresistance, higher rates of relapse, and poorer overall prognosis to

1 AML exhibiting high *EVI1* expression<sup>7,41,42</sup>. We hypothesized that the addition of venetoclax, a  
2 BH3 mimetic and small-molecule inhibitor of Bcl-2, to LSD1 inhibition would enhance anti-  
3 leukemic activity and apoptotic priming in LSK-derived MLL-AF9 leukemias *in vivo* and reverse  
4 resistance to LSD1 inhibition. Venetoclax is now approved for use in combination with  
5 hypomethylating agents for AML patients who were deemed to be unfit for standard induction  
6 in the upfront setting with very promising response rates even among AML patients with  
7 adverse-risk molecular features<sup>43-45</sup>. We postulated that targeting Bcl-2 in combination with  
8 LSD1 inhibition would enhance apoptosis induction in LSK-derived leukemias that exhibit  
9 blunted p53 activity and apoptotic priming. To test this hypothesis, we performed *in vitro*  
10 growth inhibitory assays comparing LSK- and GMP-derived leukemias in a two-drug matrix using  
11 variable concentrations of IMG-7289 and venetoclax (**Supp. Figure 3e**). From these data, we  
12 derived synergy scores using Bliss independence models (**Supp. Table 2**) and found that the  
13 lowest concentrations of IMG-7289 and venetoclax at which synergy (defined as Bliss score >  
14 10) was achieved were 1  $\mu$ M and 1 nM, respectively. This synergy was seen for LSK-MLL-AF9 as  
15 well as for GMP-MLL-AF9 leukemias. To test this synergy *in vivo*, we transplanted recipient mice  
16 with resistant LSK-MLL-AF9 cells and began treating cohorts via oral gavage with vehicle, IMG-  
17 7289, venetoclax, or combination IMG-7289 and venetoclax therapy for 14 days. While  
18 administration of IMG-7289 or venetoclax as monotherapy did not result in a statistically  
19 significant reduction in the absolute numbers of GFP<sup>+</sup> LSK-MLL-AF9 cells per femur in each  
20 recipient mouse, combination IMG-7289 and venetoclax therapy reduced absolute leukemic  
21 blasts per femur (**Figure 4h**). Similarly, combination therapy induced a significant reduction in  
22 the percentage of GFP<sup>+</sup> leukemic blasts in the bone marrow (**Figure 4i**). Furthermore,  
23 venetoclax monotherapy enhanced the proportion of Annexin V<sup>+</sup> MLL-AF9 cells, but the  
24 addition of IMG-7289 to venetoclax further enhanced the fraction of apoptotic leukemic blasts  
25 within the bone marrow compartment (**Figure 4j**). These data suggest that the addition of  
26 venetoclax to IMG-7289 can enhance anti-leukemic activity in *Evi1*<sup>high</sup> LSK-derived MLL-AF9  
27 leukemia cells.

28

29 **Discussion**

1 In this study, we show that leukemias initiated by MLL-AF9 arising from distinct mouse or  
2 human hematopoietic stem/progenitor compartments exhibit markedly different therapeutic  
3 susceptibilities to cytotoxic chemotherapy, ionizing radiation, and LSD1 inhibition. These cell-of-  
4 origin-dependent effects are conferred by differential p53 protein levels, which is related to  
5 differential *Evi1* expression in murine and human leukemic contexts. Our data suggest that cell  
6 of origin can influence p53 activity – not through genomic or transcriptional aberrations in p53  
7 – but rather through regulating p53 protein abundance. While it currently remains unclear how  
8 p53 protein abundance is controlled, a number of well-characterized post-translational  
9 modifications, including but not limited to MDM2-mediated ubiquitination of p53, could be  
10 mediating this effect and well suited to subsequent functional interrogation.

11  
12 Previous studies have demonstrated leukemogenic fusion genes, such as MLL-AF9, have the  
13 capacity to induce transformation of murine hematopoietic stem cells and of myeloid  
14 progenitors, and that these leukemias have many similarities in their biology and in the  
15 immunophenotype of the cells capable of propagating the disease<sup>4,46</sup>. However, our data  
16 suggest that specific features of the disease, including epigenetic regulation of the *Evi1* locus  
17 and sensitivity to LSD1 inhibition or to genotoxic stress, is governed by the cell type which  
18 acquires the leukemia-defining genetic alteration. Notably, cell of origin does not impact the  
19 responsiveness of AML cells to epigenetic therapies which induce therapeutic efficacy primarily  
20 through induction of differentiation, such as Dot1L inhibition, and does not impact the ability of  
21 LSD1 inhibition to promote myeloid maturation of leukemic cells based on cell of origin.  
22 Furthermore, our studies of umbilical cord blood-derived MLL-AF9 leukemias established  
23 definitively that (1) both human HSCs and GMPs can be transformed by MLL-AF9 and that (2)  
24 human MLL-AF9 leukemias arising from different cells of origin, like murine leukemias, exhibit  
25 differential apoptotic priming and p53 protein stability. Subsequent studies will delineate  
26 whether cell-of-origin impacts the response to additional anti-leukemic therapeutic modalities,  
27 and if cell of origin modulates therapeutic dependencies in other AML subtypes with different  
28 somatic alterations.

29

1 Our functional studies led us to evaluate whether pro-apoptotic BH3 mimetics such as  
2 venetoclax, in combination with LSD1 inhibition, could overcome the drug resistance seen in  
3 *Evi1*<sup>high</sup> leukemias. Taken together, our findings delineate a role for *Evi1* in perturbing p53  
4 protein stability in an otherwise p53 genetically wild-type malignancy, which influences  
5 sensitivity to chemotherapy and targeted epigenetic therapies. Our work identifies a particular  
6 pathway of drug resistance conferred through *Evi1* that can be circumvented by therapeutic  
7 combinations that short-circuit apoptotic priming through Bcl-2.

8

## 9 **Methods**

10 Methods and any associated references are available in the online version of the paper.

## 11 **References**

- 12 1 Polak, P. *et al.* Cell-of-origin chromatin organization shapes the mutational landscape of  
13 cancer. *Nature* **518**, 360-364, doi:10.1038/nature14221 (2015).
- 14 2 Hoadley, K. A. *et al.* Cell-of-Origin Patterns Dominate the Molecular Classification of  
15 10,000 Tumors from 33 Types of Cancer. *Cell* **173**, 291-304 e296,  
16 doi:10.1016/j.cell.2018.03.022 (2018).
- 17 3 George, J. *et al.* Leukaemia cell of origin identified by chromatin landscape of bulk  
18 tumour cells. *Nat Commun* **7**, 12166, doi:10.1038/ncomms12166 (2016).
- 19 4 Krivtsov, A. V. *et al.* Cell of origin determines clinically relevant subtypes of MLL-  
20 rearranged AML. *Leukemia* **27**, 852-860, doi:10.1038/leu.2012.363 (2013).
- 21 5 Stavropoulou, V. *et al.* MLL-AF9 Expression in Hematopoietic Stem Cells Drives a Highly  
22 Invasive AML Expressing EMT-Related Genes Linked to Poor Outcome. *Cancer cell* **30**,  
23 43-58, doi:10.1016/j.ccell.2016.05.011 (2016).
- 24 6 Bindels, E. M. *et al.* EVI1 is critical for the pathogenesis of a subset of MLL-AF9-  
25 rearranged AMLs. *Blood* **119**, 5838-5849, doi:10.1182/blood-2011-11-393827 (2012).
- 26 7 Groschel, S. *et al.* Deregulated expression of EVI1 defines a poor prognostic subset of  
27 MLL-rearranged acute myeloid leukemias: a study of the German-Austrian Acute  
28 Myeloid Leukemia Study Group and the Dutch-Belgian-Swiss HOVON/SAKK Cooperative  
29 Group. *Journal of clinical oncology : official journal of the American Society of Clinical*  
30 *Oncology* **31**, 95-103, doi:10.1200/JCO.2011.41.5505 (2013).
- 31 8 Noordermeer, S. M. *et al.* High BRE expression predicts favorable outcome in adult  
32 acute myeloid leukemia, in particular among MLL-AF9-positive patients. *Blood* **118**,  
33 5613-5621, doi:10.1182/blood-2011-06-359182 (2011).
- 34 9 Mosammamarast, N. *et al.* The histone demethylase LSD1/KDM1A promotes the DNA  
35 damage response. *J Cell Biol* **203**, 457-470, doi:10.1083/jcb.201302092 (2013).
- 36 10 Scoumanne, A. & Chen, X. The lysine-specific demethylase 1 is required for cell  
37 proliferation in both p53-dependent and -independent manners. *The Journal of*  
38 *biological chemistry* **282**, 15471-15475, doi:10.1074/jbc.M701023200 (2007).



- 1 11 Feng, Z. *et al.* Pharmacological inhibition of LSD1 for the treatment of MLL-rearranged  
2 leukemia. *J Hematol Oncol* **9**, 24, doi:10.1186/s13045-016-0252-7 (2016).
- 3 12 Harris, W. J. *et al.* The histone demethylase KDM1A sustains the oncogenic potential of  
4 MLL-AF9 leukemia stem cells. *Cancer cell* **21**, 473-487, doi:10.1016/j.ccr.2012.03.014  
5 (2012).
- 6 13 Morera, L., Lubbert, M. & Jung, M. Targeting histone methyltransferases and  
7 demethylases in clinical trials for cancer therapy. *Clin Epigenetics* **8**, 57,  
8 doi:10.1186/s13148-016-0223-4 (2016).
- 9 14 Schenk, T. *et al.* Inhibition of the LSD1 (KDM1A) demethylase reactivates the all-trans-  
10 retinoic acid differentiation pathway in acute myeloid leukemia. *Nature medicine* **18**,  
11 605-611, doi:10.1038/nm.2661 (2012).
- 12 15 Kataoka, K. *et al.* Evi1 is essential for hematopoietic stem cell self-renewal, and its  
13 expression marks hematopoietic cells with long-term multilineage repopulating activity.  
14 *The Journal of experimental medicine* **208**, 2403-2416, doi:10.1084/jem.20110447  
15 (2011).
- 16 16 Edvardsson, L., Dykes, J. & Olofsson, T. Isolation and characterization of human myeloid  
17 progenitor populations--TpoR as discriminator between common myeloid and  
18 megakaryocyte/erythroid progenitors. *Experimental hematology* **34**, 599-609,  
19 doi:10.1016/j.exphem.2006.01.017 (2006).
- 20 17 Goardon, N. *et al.* Coexistence of LMPP-like and GMP-like leukemia stem cells in acute  
21 myeloid leukemia. *Cancer cell* **19**, 138-152, doi:10.1016/j.ccr.2010.12.012 (2011).
- 22 18 Manz, M. G., Miyamoto, T., Akashi, K. & Weissman, I. L. Prospective isolation of human  
23 clonogenic common myeloid progenitors. *Proceedings of the National Academy of  
24 Sciences of the United States of America* **99**, 11872-11877, doi:10.1073/pnas.172384399  
25 (2002).
- 26 19 Xie, H. *et al.* Polycomb repressive complex 2 regulates normal hematopoietic stem cell  
27 function in a developmental-stage-specific manner. *Cell Stem Cell* **14**, 68-80,  
28 doi:10.1016/j.stem.2013.10.001 (2014).
- 29 20 Cui, K. *et al.* Chromatin signatures in multipotent human hematopoietic stem cells  
30 indicate the fate of bivalent genes during differentiation. *Cell Stem Cell* **4**, 80-93,  
31 doi:10.1016/j.stem.2008.11.011 (2009).
- 32 21 Bernt, K. M. *et al.* MLL-rearranged leukemia is dependent on aberrant H3K79  
33 methylation by DOT1L. *Cancer cell* **20**, 66-78, doi:10.1016/j.ccr.2011.06.010 (2011).
- 34 22 Yamakawa, N., Kaneda, K., Saito, Y., Ichihara, E. & Morishita, K. The increased expression  
35 of integrin alpha6 (ITGA6) enhances drug resistance in EVI1(high) leukemia. *PloS one* **7**,  
36 e30706, doi:10.1371/journal.pone.0030706 (2012).
- 37 23 Overbeeke, R., Yildirim, M., Reutelingsperger, C. P., Haanen, C. & Vermes, I. Sequential  
38 occurrence of mitochondrial and plasma membrane alterations, fluctuations in cellular  
39 Ca<sup>2+</sup> and pH during initial and later phases of cell death. *Apoptosis* **4**, 455-460 (1999).
- 40 24 Zamzami, N. *et al.* Reduction in mitochondrial potential constitutes an early irreversible  
41 step of programmed lymphocyte death in vivo. *The Journal of experimental medicine*  
42 **181**, 1661-1672 (1995).

- 1 25 Bhola, P. D. *et al.* Functionally identifiable apoptosis-insensitive subpopulations  
2 determine chemoresistance in acute myeloid leukemia. *The Journal of clinical*  
3 *investigation* **126**, 3827-3836, doi:10.1172/JCI82908 (2016).
- 4 26 Deng, J. *et al.* BH3 profiling identifies three distinct classes of apoptotic blocks to predict  
5 response to ABT-737 and conventional chemotherapeutic agents. *Cancer cell* **12**, 171-  
6 185, doi:10.1016/j.ccr.2007.07.001 (2007).
- 7 27 Gutierrez-Martinez, P. *et al.* Diminished apoptotic priming and ATM signalling confer a  
8 survival advantage onto aged haematopoietic stem cells in response to DNA damage.  
9 *Nat Cell Biol* **20**, 413-421, doi:10.1038/s41556-018-0054-y (2018).
- 10 28 Huang, C. H. *et al.* CDK9-mediated transcription elongation is required for MYC addiction  
11 in hepatocellular carcinoma. *Genes & development* **28**, 1800-1814,  
12 doi:10.1101/gad.244368.114 (2014).
- 13 29 Kleinsimon, S. *et al.* GADD45A and CDKN1A are involved in apoptosis and cell cycle  
14 modulatory effects of viscumTT with further inactivation of the STAT3 pathway.  
15 *Scientific reports* **8**, 5750, doi:10.1038/s41598-018-24075-x (2018).
- 16 30 Baker, A. *et al.* The CDK9 Inhibitor Dinaciclib Exerts Potent Apoptotic and Antitumor  
17 Effects in Preclinical Models of MLL-Rearranged Acute Myeloid Leukemia. *Cancer*  
18 *research* **76**, 1158-1169, doi:10.1158/0008-5472.CAN-15-1070 (2016).
- 19 31 Subramanian, A. *et al.* Gene set enrichment analysis: a knowledge-based approach for  
20 interpreting genome-wide expression profiles. *Proceedings of the National Academy of*  
21 *Sciences of the United States of America* **102**, 15545-15550,  
22 doi:10.1073/pnas.0506580102 (2005).
- 23 32 Kannan, K. *et al.* DNA microarrays identification of primary and secondary target genes  
24 regulated by p53. *Oncogene* **20**, 2225-2234, doi:10.1038/sj.onc.1204319 (2001).
- 25 33 Baslan, T. *et al.* Optimizing sparse sequencing of single cells for highly multiplex copy  
26 number profiling. *Genome Res* **25**, 714-724, doi:10.1101/gr.188060.114 (2015).
- 27 34 Cancer Genome Atlas Research, N. *et al.* Genomic and epigenomic landscapes of adult  
28 de novo acute myeloid leukemia. *The New England journal of medicine* **368**, 2059-2074,  
29 doi:10.1056/NEJMoa1301689 (2013).
- 30 35 Aliouat-Denis, C. M. *et al.* p53-independent regulation of p21Waf1/Cip1 expression and  
31 senescence by Chk2. *Mol Cancer Res* **3**, 627-634, doi:10.1158/1541-7786.MCR-05-0121  
32 (2005).
- 33 36 Macleod, K. F. *et al.* p53-dependent and independent expression of p21 during cell  
34 growth, differentiation, and DNA damage. *Genes & development* **9**, 935-944 (1995).
- 35 37 Fang, J. *et al.* Upregulation of CD11b and CD86 through LSD1 inhibition promotes  
36 myeloid differentiation and suppresses cell proliferation in human monocytic leukemia  
37 cells. *Oncotarget* **8**, 85085-85101, doi:10.18632/oncotarget.18564 (2017).
- 38 38 McGrath, J. P. *et al.* Pharmacological Inhibition of the Histone Lysine Demethylase  
39 KDM1A Suppresses the Growth of Multiple Acute Myeloid Leukemia Subtypes. *Cancer*  
40 *research* **76**, 1975-1988, doi:10.1158/0008-5472.CAN-15-2333 (2016).
- 41 39 Maiques-Diaz, A. *et al.* Enhancer Activation by Pharmacologic Displacement of LSD1  
42 from GFI1 Induces Differentiation in Acute Myeloid Leukemia. *Cell reports* **22**, 3641-  
43 3659, doi:10.1016/j.celrep.2018.03.012 (2018).

1 40 Cusan, M. *et al.* LSD1 inhibition exerts its antileukemic effect by recommissioning PU.1-  
2 and C/EBPalpha-dependent enhancers in AML. *Blood* **131**, 1730-1742,  
3 doi:10.1182/blood-2017-09-807024 (2018).

4 41 Groschel, S. *et al.* High EVI1 expression predicts outcome in younger adult patients with  
5 acute myeloid leukemia and is associated with distinct cytogenetic abnormalities.  
6 *Journal of clinical oncology : official journal of the American Society of Clinical Oncology*  
7 **28**, 2101-2107, doi:10.1200/JCO.2009.26.0646 (2010).

8 42 Lugthart, S. *et al.* Clinical, molecular, and prognostic significance of WHO type  
9 inv(3)(q21q26.2)/t(3;3)(q21;q26.2) and various other 3q abnormalities in acute myeloid  
10 leukemia. *Journal of clinical oncology : official journal of the American Society of Clinical*  
11 *Oncology* **28**, 3890-3898, doi:10.1200/JCO.2010.29.2771 (2010).

12 43 DiNardo, C. D. *et al.* Venetoclax combined with decitabine or azacitidine in treatment-  
13 naive, elderly patients with acute myeloid leukemia. *Blood*, doi:10.1182/blood-2018-08-  
14 868752 (2018).

15 44 DiNardo, C. D. *et al.* Safety and preliminary efficacy of venetoclax with decitabine or  
16 azacitidine in elderly patients with previously untreated acute myeloid leukaemia: a  
17 non-randomised, open-label, phase 1b study. *The Lancet. Oncology* **19**, 216-228,  
18 doi:10.1016/S1470-2045(18)30010-X (2018).

19 45 DiNardo, C. D. *et al.* Clinical experience with the BCL2-inhibitor venetoclax in  
20 combination therapy for relapsed and refractory acute myeloid leukemia and related  
21 myeloid malignancies. *Am J Hematol* **93**, 401-407, doi:10.1002/ajh.25000 (2018).

22 46 Krivtsov, A. V. *et al.* Transformation from committed progenitor to leukaemia stem cell  
23 initiated by MLL-AF9. *Nature* **442**, 818-822, doi:10.1038/nature04980 (2006).

24 47 Kustikova, O. S. *et al.* Activation of Evi1 inhibits cell cycle progression and differentiation  
25 of hematopoietic progenitor cells. *Leukemia* **27**, 1127-1138, doi:10.1038/leu.2012.355  
26 (2013).  
27  
28

## 1 **Acknowledgements**

2 We thank members of the Levine, Armstrong, and Lowe laboratories for discussions. We thank  
3 Yanming Zhang for assistance with cytogenetic analysis of AML patient samples. S.F.C. is  
4 supported by a Scholar Award from the American Society of Hematology, a Momentum  
5 Fellowship Award from The Mark Foundation for Cancer Research, a Young Investigator Award  
6 from The Truth 365 and the Rally Foundation for Childhood Cancer Research, a Young  
7 Investigator Award from the Conquer Cancer Foundation, a Career Development Program  
8 Fellow Award (5453-17) from the Leukemia & Lymphoma Society, and a Memorial Sloan  
9 Kettering Cancer Center Clinical Scholars Biomedical Research Fellowship. R.L.L. is supported by  
10 National Cancer Institute grants P01 CA108671 and R35197594 as well as a Leukemia &  
11 Lymphoma Society Specialized Center of Research grant. S.A.A. is supported by grants from the  
12 National Institutes of Health (NIH), National Cancer Institute grants PO1 CA66996 and R01  
13 CA140575, and Gabrielle's Angel Research Foundation. Studies supported by Memorial Sloan  
14 Kettering core facilities were supported in part by Memorial Sloan Kettering Cancer Center  
15 Support Grant/Core Grant P30 CA008748.

16

## 17 **Author contributions**

18 S.F.C., H.Y.R., A.L., R.L.L., and S.A.A. conceived the project, designed the experiments, analysed  
19 the data, and wrote the manuscript. S.F.C., S.H.C., S.P., M.C., C-H.H., and C-W.C. performed the  
20 experiments with technical assistance from K.B.C., V.D., M.K., and M.R. ChIP-seq and RNA-seq  
21 computational analyses were performed by R.P.K. and L.Z. J.Z., T.B., and S.W.L. generated  
22 custom shRNA libraries and performed copy number analyses. A.D.G., J.L.G., E.M.S., M.S.T., and  
23 C.F. assisted with management of clinical data and specimens. F.S. assisted with pathological  
24 assessment of biospecimens.

25

## 26 **Competing Interests**

27 S.F.C. is a consultant for Imago Biosciences and has received honoraria from DAVA Oncology.  
28 R.L.L. is on the supervisory board of Qiagen and is a scientific advisor to Loxo, Imago, C4  
29 Therapeutics and Isoplexis. He receives research support from and consulted for Celgene and

1 Roche, research support from Prelude Therapeutics, and has consulted for Novartis and Gilead.  
2 He has received honoraria from Lilly and Amgen for invited lectures. S.A.A. is a consultant  
3 and/or shareholder for Epizyme Inc, Imago Biosciences, Cyteir Therapeutics, C4 Therapeutics,  
4 Syros Pharmaceuticals, OxStem Oncology, Accent Therapeutics and Mana Therapeutics. S.A.A.  
5 has received research support from Janssen, Novartis, and AstraZeneca. E.M.S. receives  
6 research support to his institution from Agios, Amgen, Bayer, Celgene, and Syros, consulting  
7 fees from Agios, Astellas, Celgene, Bayer, Daiichi-Sankyo, Genentech, Menarini, Novartis, PTC  
8 Therapeutics, and Syros. E.M.S. also holds equity interest in Auron Therapeutics. M.S.T. receives  
9 research support to his institution from Abbvie, Cellerant, Orsenix, ADC Therapeutics, and  
10 Biosight. M.S.T. also received royalties from UpToDate and is on the advisory board of Abbvie,  
11 BioLineRx, Daiichi-Sankyo, Orsenix, KAHR, Rigel, Nohla, Delta Fly Pharma, and Tetrphase.  
12 A.D.G. has received research funding from Abbvie, ADC Therapeutics, American Society of  
13 Clinical Oncology, American Society of Hematology, Arog Pharmaceuticals, Daiichi-Sankyo, and  
14 Pfizer, and has received speaker's honorarium and travel reimbursements from DAVA Oncology  
15 and compensation from Abbvie, Celgene, and Daiichi-Sankyo for service as a consultant.  
16 S.W.L. is a consultant and/or shareholder for Blueprint Medicines, ORIC Pharmaceuticals,  
17 Mirimus, Inc., Faeth Therapeutics, PMV Pharmaceuticals, Constellation Pharmaceuticals, and  
18 Petra Pharmaceuticals, and has received research support from Philips. H.Y.R. is an employee of  
19 Imago BioSciences, on the Board of Directors and an equity holder.

1 **Figure Legends**

2

3 **Figure 1. Differential sensitivity of LSK- and GMP-derived MLL-AF9 leukemias to LSD1**  
4 **inhibition is Evi1-dependent.**

5 (A) Independent murine LSK- and GMP-derived MLL-AF9 leukemias were treated for 3 days with  
6 variable concentrations of IMG-7289 *in vitro*. Cell Titer Glo assays were used to quantitate  
7 viable cells cultured in triplicate wells and percent response was derived by normalizing to  
8 corresponding cells cultured in DMSO vehicle control. (B) Wild-type C57BL/6 mice engrafted  
9 with  $5 \times 10^4$  syngeneic GMP-MLL-AF9 cells were treated via oral gavage daily with IMG-7289 at a  
10 dose of 25 mg/kg (N=12 mice) or vehicle control (N=12 mice) during a 14-day treatment  
11 window (grey box). Kaplan-Meier survival curves comparing IMG-7289-treated and vehicle  
12 treated mice are shown. (C) Wild-type C57BL/6 mice engrafted with  $5 \times 10^4$  syngeneic LSK-MLL-  
13 AF9 cells were treated via oral gavage daily with IMG-7289 at a dose of 25 mg/kg (N=12 mice)  
14 or vehicle control (N=12 mice) during a 14-day treatment window (grey box). Kaplan-Meier  
15 survival curves comparing IMG-7289-treated and vehicle treated mice are shown. (D) qRT-PCR  
16 was performed to measure abundance of Evi1 transcripts in GMP-MLL-AF9, LSK-MLL-AF9,  
17 normal sorted GMP cells, and normal sorted LSK cells from C57BL/6 wild-type mice. Bar graphs  
18 shown represent pooled biological replicates from 3 independent leukemias and 3 independent  
19 sorted LSKs and GMPs. (E) qRT-PCR data assessing Evi1 mRNA levels in human cord blood GMP-  
20 and HSC-derived MLL-AF9 leukemias engrafted in sublethally irradiated NSG mice and normal  
21 human cord blood GMP and HSC cells. (F) H3K27me3 ChIP-seq tracks at the Evi1 locus of normal  
22 GMP and LSK cells from previously published datasets<sup>21</sup>. Representative H3K27me3 ChIP-seq  
23 tracks are also shown from GMP-MLL-AF9 and LSK-MLL-AF9 cells. (G) RNA-seq (green) and  
24 H3K27me3 (black) ChIP-seq tracks at the *EVI1* locus from *MLL*-rearranged AML patient samples  
25 (N=3) exhibiting either high or low expression of *EVI1*. (H) qRT-PCR expression analysis of Evi1  
26 from LSK-MLL-AF9 cells transduced with either a non-targeting control shRNA or two  
27 independent shRNAs targeting Evi1. (I) Western blot analysis of LSK-MLL-AF9 cells expressing  
28 control shRNA or Evi1 shRNAs as in H. (J) Bar plots representing IC<sub>50</sub> values from 3 independent  
29 Cell Titer Glo doxorubicin kill curve assays using LSK-MLL-AF9 cells expressing non-targeting

1 control shRNA or Evi1 shRNAs. (K) Bar plots depicting normalized viable cell counts 24 hours  
2 after exposure to ionizing radiation (0, 1, 2, or 3 Gy), comparing LSK-MLL-AF9 cells transduced  
3 with either a non-targeting control shRNA or two independent shRNAs targeting Evi1. Data  
4 shown are representative of 3 independent experiments. (L) Bar plots representing IC<sub>50</sub> values  
5 from 3 independent Cell Titer Glo IMG-7289 kill curve assays using LSK-MLL-AF9 cells expressing  
6 non-targeting control shRNA or Evi1 shRNAs.

7

8 **Figure 2. Differential apoptotic thresholds in murine and human MLL-AF9 leukemias arising**  
9 **from distinct cells of origin.**

10 LSK- and GMP-derived MLL-AF9 leukemias were treated with DMSO or 1 μM IMG-7289. (A)  
11 Viable DAPI<sup>+</sup> cells were enumerated after 48 hours of treatment. (B) Annexin V and DAPI  
12 staining was assessed by flow cytometry. p<0.03, using Student's t-test comparing percent  
13 Annexin V-positive cells between GMP- and LSK-derived. Data shown are representative of 3  
14 independent experiments. (C) TMRE staining was measured by flow cytometry as a readout of  
15 mitochondrial membrane potential after 48 hours of treatment. Statistical analyses  
16 summarized in (D). Data shown are representative of 3 independent experiments. (D) Summary  
17 scatter plots depicting the percentage of cells within the  $\psi^{\text{low}}$  gate defined by TMRE flow  
18 cytometry in (C). BH3 profiling of (E) murine LSK- and GMP-derived MLL-AF9 leukemia cells or  
19 (F) human cord blood HSC- and GMP-derived leukemias exposed to DMSO control or pro-  
20 apoptotic peptides.

21

22 **Figure 3. p53 protein abundance and transcriptional output is greater in GMP-MLL-AF9**  
23 **relative to LSK-MLL-AF9 and hHSC-MLL-AF9.**

24 (A) An shRNA screen identifies enrichment of an shRNA targeting Trp53 (red) after treatment  
25 with IMG-7289. (B) GSEA was used to compare steady-state RNA-seq datasets from 3  
26 independent untreated LSK-MLL-AF9 and 3 untreated GMP-MLL-AF9 leukemias (left and right  
27 panels). Previously published TCGA<sup>34</sup> RNA-seq datasets from 27 AML patient samples with high  
28 *EVI1* expression and 27 samples with low *EVI1* expression were analyzed by GSEA (center  
29 panel). (C) Heatmap representation of RNA-seq expression levels of a subset of p53 target

1 genes from 3 independent untreated LSK-MLL-AF9 and 3 untreated GMP-MLL-AF9 leukemias.  
2 (D) qRT-PCR analysis of Bax and Noxa mRNA upregulation in GMP-MLL-AF9, LSK-MLL-AF9 and  
3 p53<sup>-/-</sup> GMP-MLL-AF9 treated for 48 hours with DMSO control or 1 μM IMG-7289. Data were  
4 normalized to DMSO control for each leukemia subtype. (E) Western blot analysis for p53  
5 protein expression in GMP-MLL-AF9 and LSK-MLL-AF9 treated for 48 hours with DMSO or 1 μM  
6 IMG-7289. Histone H3 was used as loading control. (F) Western blot analysis for p53 in human  
7 cord blood hGMP-MLL-AF9 and hHSC-MLL-AF9 cells. Histone H3 used as loading control. (G)  
8 qRT-PCR analysis of p53 mRNA expression in independent GMP-MLL-AF9 and LSK-MLL-AF9  
9 leukemias treated for 48 hours with DMSO or 1 μM IMG-7289. Data were normalized to DMSO  
10 control for each leukemia line. (H) p53 Western blot analysis of LSK-MLL-AF9 cells expressing  
11 control shRNA or independent Evi1 shRNAs. (I) NIH-3T3 cells were transiently transfected with  
12 empty vector or FLAG-tagged Evi1 plasmid constructs and treated for 3 hours with variable  
13 concentrations of doxorubicin. p53, FLAG, and histone H3 Western blots are shown. (J) LSK-  
14 MLL-AF9 cells were treated with increasing concentrations of the MDM2 inhibitor RG7388 for 3  
15 days and compared to untreated GMP-MLL-AF9 to assess p53 protein abundance by Western  
16 blot. (K) LSK-MLL-AF9 cells were pretreated with 200 nM RG7388 and subjected to Cell Titer Glo  
17 IMG-7289 kill curve assays with GMP-MLL-AF9 and LSK-MLL-AF9 without RG7388 pre-treatment  
18 for comparison. Bar plots of IC<sub>50</sub> values from 3 independent Cell Titer Glo IMG-7289 kill curve  
19 assays are shown.

20

21 **Figure 4. p53 loss in sensitive GMP-MLL-AF9 leukemias induces resistance to the pro-**  
22 **apoptotic but not pro-differentiation effects of LSD1 inhibition.**

23 (A) GMP-MLL-AF9 cells were transduced with shRNAs targeting Renilla luciferase control or p53  
24 and assayed in Cell Titer Glo IMG-7289 kill curves. Data shown are representative of 4  
25 independent experiments. (B) Primary MLL-AF9 leukemias arising from GMPs derived from  
26 either p53 wild-type or p53<sup>-/-</sup> mice were assessed for IMG-7289 sensitivity in vitro by Cell Titer  
27 Glo kill curves. Data shown are representative of 4 independent experiments. (C) GMP-MLL-AF9  
28 cells expressing shRNAs targeting Renilla or p53 were treated for 48 hours at 1 μM IMG-7289  
29 and TMRE fluorescence was measured by flow cytometry. Statistical analyses summarized in



1 (D). Data shown are representative of 4 independent experiments. (D) Summary scatter plots  
2 depicting the percentage of cells within the  $\psi^{\text{low}}$  gate defined by TMRE flow cytometry in C. (E)  
3 Summary plots showing the proportion of Annexin V<sup>+</sup> apoptotic cells after GMP-MLL-AF9 cells  
4 expressing shRNAs targeting Renilla or p53 were treated for 48 hours at 1  $\mu\text{M}$  IMG-7289. (F)  
5 GMP-MLL-AF9 cells expressing shRNAs targeting Renilla or p53 were treated for 48 hours at 1  
6  $\mu\text{M}$  IMG-7289 and assessed for cell surface CD86 expression by flow cytometry. Scatter plots  
7 depicting mean fluorescence intensity of CD86 staining is shown. Data shown are  
8 representative of 3 independent experiments. (G)  $2 \times 10^5$  parental GMP-MLL-AF9, GMP-MLL-AF9  
9 expressing Renilla shRNA, GMP-MLL-AF9 expressing p53 shRNA, and LSK-MLL-AF9 cells were  
10 irradiated (5 Gy). Viable cells were enumerated after culturing for 24 hours post-irradiation. Bar  
11 plots represent viable cell counts as a percentage of input cell number. (H) C57BL/6 wild-type  
12 mice were engrafted with resistant LSK-MLL-AF9 cells and treated via oral gavage with vehicle  
13 (N=5), IMG-2789 alone (25 mg/kg, N=5), venetoclax alone (100 mg/kg, N=5), or combination  
14 IMG-2789 (25 mg/kg) and venetoclax (100 mg/kg, N=5) during a 14-day treatment window. At  
15 day 21 post-transplant, bone marrow cells were harvested and viable GFP<sup>+</sup> leukemia cells were  
16 enumerated per femur. (I) Percentages of GFP<sup>+</sup> AML cells within the bone marrow are shown,  
17 and (J) proportions of Annexin V<sup>+</sup>GFP<sup>+</sup> apoptotic leukemia cells are shown.

18

19

1 **Supplemental Figure Legends**

2

3 **Supplemental Figure 1.**

4 (A) Independent murine LSK- and GMP-derived MLL-AF9 leukemias were treated for 3 days with  
5 variable concentrations of doxorubicin *in vitro*. Cell Titer Glo assays were used to quantitate  
6 viable cells cultured in triplicate wells and percent response was derived by normalizing to  
7 corresponding cells cultured in DMSO vehicle control. (B) Independent murine LSK- and GMP-  
8 derived MLL-AF9 leukemias were passaged and absolute cells were enumerated every 3 days  
9 over a 12-day period, and (C) doubling times were derived from this culture period. (D) LSK- and  
10 GMP-derived MLL-AF9 leukemia cells were subjected to IMG-7289 kill curve assays after culture  
11 over time spanning a 15-day treatment period. Bar plots represent IC<sub>50</sub> values derived from  
12 independent MLL-AF9 lines. (E) Kill curve assays assessing LSK- and GMP-MLL-AF9 cells after 3  
13 days of treatment with the LSD1 inhibitor IMG-98. (F) Kill curve assays assessing LSK- and GMP-  
14 MLL-AF9 cells after 15 days of treatment with the DOT1L inhibitor EPZ-5676. (G) Representative  
15 flow plots from human cord blood HSC- and GMP-derived MLL-AF9 leukemia cells harvested  
16 from the bone marrow of engrafted NSG recipient mice, showing expression of the myeloid  
17 marker CD33 after gating on GFP<sup>+</sup> leukemic blasts.

18

19 **Supplemental Figure 2.**

20 (A) Summary bar plots depicting comprehensive BH3 profiling data spanning all peptides and  
21 compounds tested. Apoptosis induction in independent GMP-MLL-AF9 and LSK-MLL-AF9  
22 murine AML lines was assessed by cytochrome C release. (B) Summary bar plots depicting BH3  
23 profiling of human cord blood HSC- and GMP-MLL-AF9 cells. (C) Bar plots showing sequencing  
24 coverage spanning all 11 exons of the Trp53 gene when independent GMP-MLL-AF9 and LSK-  
25 MLL-AF9 cells are subjected to (D) next-generation targeted sequencing analysis of a panel of  
26 572 murine cancer-associated genes. Mutations called are shown with variant allele fractions  
27 (VAFs) shown within each box corresponding to the specific MLL-AF9 cell line (top). (E) Low-  
28 pass whole genome sequencing was performed on independent GMP-MLL-AF9 and LSK-MLL-  
29 AF9 lines. Zoomed-in-view of the copy number of independent LSK-MLL-AF9 (red) and GMP-

1 MLL-AF9 (blue) leukemias at the 11B3 locus (syntenic to human 17q13.1) showing retention of  
2 both alleles of the Trp53 gene (vertical gray bar). (F) qRT-PCR analysis of p21 mRNA  
3 upregulation in GMP-MLL-AF9, LSK-MLL-AF9 and p53<sup>-/-</sup> GMP-MLL-AF9 treated for 48 hours with  
4 DMSO control or 1 μM IMG-7289. Data were normalized to DMSO control for each leukemia  
5 subtype. (G) Prolonged exposure of p53 Western blot shown in **Figure 3E**.

6

### 7 **Supplemental Figure 3.**

8 (A) Western blot analysis showing Bcl-2 and Histone H3 (loading control) protein expression in 3  
9 independent GMP-MLL-AF9 cell lines transduced with either empty vector or a Bcl-2 expression  
10 vector after selection with puromycin. (B) BH3 profiling of murine GMP-derived MLL-AF9  
11 leukemia cells expressing empty vector (black) or Bcl-2 (red). (C) Scatter plots depicting IC<sub>50</sub>  
12 values derived from independent Cell Titer Glo IMG-7289 kill curve assays using GMP-MLL-AF9  
13 cells expressing empty vector or Bcl-2. (D) Bar plots depicting normalized viable cell counts 24  
14 hours after exposure to 10 nM doxorubicin, comparing GMP-MLL-AF9 cells transduced with  
15 either empty vector (purple bar) or Bcl-2 (red bar). Data shown are representative of 4  
16 independent experiments. (E) Viable cell counts (normalized to DMSO control) represented in  
17 heat map form for LSK-MLL-AF9 (left) and GMP-MLL-AF9 (right) treated for 72 hours with  
18 variable concentrations of venetoclax (y-axis) and IMG-7289 (x-axis). Data are representative of  
19 3 independent experiments. (F) Western blot analysis showing gamma-H2AX and histone H3  
20 (loading control) protein expression in GMP-MLL-AF9 (indicated by red bars) and LSK-MLL-AF9  
21 (indicated by blue bars) cells treated over a 6-hour time course with 1 μM IMG-7289. Data are  
22 representative of 3 independent experiments. (G) Western blot analysis showing p53 and  
23 histone H3 (loading control) protein expression in NIH-3T3 cells transduced with either empty  
24 vector or a codon-optimized version of murine Evi1 and treated for 24 hrs with increasing  
25 concentrations of bortezomib (0, 0.1, 1, and 10 μM). Data are representative of 3 independent  
26 experiments.

27

## 1 **Online Methods**

2 **Mice.** Laboratory mice were housed at the Memorial Sloan Kettering Cancer Center (MSKCC)  
3 animal facility. All animal procedures were approved by the Institutional Animal Care and Use  
4 Committee. C57BL/6 mice (CD45.2, Charles River) were used as transplantation recipients. p53  
5 knockout mice (002101) were obtained from The Jackson Laboratory. Both female and male  
6 mice were used in our leukemia studies and no obvious sex-dependent differences were  
7 observed.

8  
9 **Human cord blood.** Normal cord blood units, designated for research use, were obtained from  
10 the New York Blood Center (New York, NY) under IRB approval from the National Cord Blood  
11 Program. Both male and female samples were randomly assigned and used in this study. The  
12 experiments were approved by the institutional biosafety committees at MSKCC.

13  
14 **Cell lines and cell culture.** 293T and NIH-3T3 cell lines were maintained in DMEM medium  
15 supplemented with 10% fetal bovine serum (FBS) and 1% penicillin-streptomycin. Cells were  
16 maintained in a humidified incubator at 37°C, 5% CO<sub>2</sub>.

17  
18 **Plasmid constructs.** A codon-optimized, doxycycline-inducible version of murine Evi1  
19 (pRRL.PPT.Tet.Evi1.IRES.EGFP.pre) and empty vector control plasmid  
20 (pRRL.PPT.Tet.Evi1.IRES.EGFP.pre) were kind gifts from Dr. Olga Kustikova, Dr. Christopher  
21 Baum, and Dr. Axel Shamback (Medizinische Hochschule Hannover, Hannover, Germany).  
22 Generation of these reagents were previously described<sup>47</sup>.

23  
24 **Murine and human MLL-AF9 leukemia models.** Murine bone marrow cells were obtained from  
25 femurs, tibias, hips, and spines and stained with a biotinylated lineage antibody cocktail  
26 (559971, BD Biosciences), Sca1-PE-Cy7, cKit-APC, and FcRg-Pacific Blue antibodies. The  
27 immunophenotypes of LSK and GMP cells are lineage<sup>-</sup>Sca1<sup>+</sup>cKit<sup>+</sup> and lineage<sup>-</sup>cKit<sup>+</sup>Sca1<sup>-</sup>  
28 CD34<sup>+</sup>FcRg<sup>+</sup>, respectively. LSK and GMP cells were isolated using a FACS Aria (BD Biosciences)  
29 and cultured for 24 hours in IMDM medium containing 15% FBS, 1% penicillin-streptomycin, 2

1 mM L-glutamine, 20 ng/mL rm-SCF, 10 ng/mL rmlL-3, 10 ng/ml rmlL-6. Spinfections were then performed by adding retrovirus carrying MLL-AF9-ires-GFP in the media containing 8  $\mu$ g/mL polybrene to either LSK or GMP cells and centrifuging at 1,400 x g for 90 minutes. MLL-AF9 immortalized LSK or GMP cells were expanded *in vitro* and a minimum of  $2 \times 10^5$  GFP<sup>+</sup> cells were transplanted into lethally irradiated (950 cGy) syngeneic recipient C57BL/6 mice along with  $2 \times 10^5$  bone marrow support cells from wild-type mice. Murine AML cells were harvested from bone marrow of moribund mice and maintained in culture. Human cord blood CD34<sup>+</sup> cells were enriched by microbeads (Miltenyi Biotec). The immunophenotypes of hHSC and hGMP cells are lineage<sup>-</sup>CD34<sup>+</sup>CD38<sup>-</sup> and lineage<sup>-</sup>CD34<sup>+</sup>CD38<sup>+</sup>CD45RA<sup>+</sup>CD110<sup>-</sup>, respectively. hHSC and hGMP cells were sorted and cultured in IMDM medium containing 20% FBS, 1% penicillin-streptomycin, 2 mM L-glutamine,  $\beta$ -mercaptoethanol, 20 ng/mL each of rh-IL-6, rhTPO, rhSCF, rhGM-CSF, and 10 ng/mL IL-3. After 24 hours in culture, hHSC and hGMP cells were retrovirally transduced with MLL-AF9-ires-GFP as was done to generate murine leukemias. Immortalized cells were expanded *in vitro*. To generate fully transformed leukemia cells, a minimum of  $1.3 \times 10^5$  GFP<sup>+</sup> MLL-AF9-expressing cells were transplanted into sublethally irradiated (250 cGy) NOD/SCID/IL-2Rg<sub>c</sub>-null (NSG) mice. AML cells were harvested from bone marrow of moribund mice.

18  
19 **Chromatin immunoprecipitation.** For ChIP-seq experiments, murine AML or primary human AML patient samples were fixed with 1% formaldehyde for 10 minutes and quenched with 0.125 M glycine for 5 minutes. Fixed cells were washed twice with ice-cold phosphate-buffered saline (PBS). Washed cells were then resuspended in ChIP lysis buffer and sheared using an E220 focused-ultrasonicator (Covaris). Appropriate amounts of antibodies were added to sheared chromatin and incubated overnight at 4<sup>o</sup> C. Immune complexes were collected with protein A/G agarose and washed sequentially in low-salt wash buffer (20 mM Tris pH 8.0, 150 mM NaCl, 0.1% SDS, 1% Triton X-100, 2mM EDTA), high-salt wash buffer (20 mM Tris pH 8.0, 500 mM NaCl, 0.1% SDS, 1% Triton X-100, 2mM EDTA), LiCl wash buffer (10 mM Tris pH 8.0, 250 mM LiCl, 1% NP-40, 1% sodium deoxycholate, 1 mM EDTA), and TE. Chromatin was eluted in elution buffer (1% SDS, 0.1 M NaHCO<sub>3</sub>), and then reverse cross-linked with 0.2 M NaCl at 65<sup>o</sup> C

1 for 4 hours. DNA was purified with a PCR purification kit (QIAGEN). Libraries were prepared  
2 using a ThruPLEX DNA-seq Kit (Rubicon Genomics). The DNA library was validated using a  
3 TapeStation (Agilent Technologies) and was quantified using a Qubit 2.0 Fluorometer (Thermo  
4 Fisher Scientific). Libraries were pooled and sequenced on an Illumina HiSeq2000.

5  
6 **RNA isolation and analysis.** Total RNA was extracted from murine AML or primary human AML  
7 patient samples using the RNeasy Mini kit (QIAGEN). cDNA was synthesized using the Tetro  
8 cDNA synthesis kit (Bioline). cDNA fragments were quantified by a TaqMan Gene expression  
9 assay (Applied Biosystems) or by SYBR Green Real-time PCR with a ViiA 7 Real-time PCR system.  
10 RNA-seq libraries were prepared by using a ThruPLEX DNA-seq Kit (Rubicon Genomics). The  
11 DNA library was validated using TapeStation (Agilent Tehnologies) and was quantified using a  
12 Qubit 2.0 Fluorometer (Thermo Fisher Scientific). Libraries were pooled and sequenced on  
13 Illumina HiSeq2000.

14  
15 **shRNA screen.** A customized shRNA library (TRMPV-Neo system) focused on mouse chromatin-  
16 regulating genes, together with control shRNAs. After sequence verification, the virus library  
17 containing 2,252 shRNAs targeting 468 genes (4 to 6 shRNAs per gene) was pooled. The virus  
18 pool was transduced into monoclonal mouse MLL-AF9 (MA9) leukemic cells, stably expressing  
19 rtTA3 (Tet-on system), at a viral titer that on average causes a single viral transduction per cell  
20 and at which each shRNA is represented in at least 2,000 cells. The infected cells were selected  
21 for 2 days in 1 mg/mL neomycin (G418 sulfate, Corning), and subsequently, shRNA expression  
22 was induced by adding 1 µg/mL doxycycline (Sigma-Aldrich). The shRNA-expressing cells (dsRed  
23 and Venus double positive) were sorted (T0) using a FACS ARIA (BD) and cultured for 6 days (T6)  
24 in either DMSO or 1 µM IMG-7289. The integrated shRNA sequences in T0 and T6 cell samples  
25 were assessed by high-throughput sequencing (HiSeq) using the Illumina Next-Gen Sequencing  
26 HiSeq platform (Illumina).

27  
28 **Computational analysis.** CHIP-seq reads were trimmed for quality and Illumina adapter  
29 sequences with 'trim\_galore' then aligned to either human assembly hg19 or mouse assembly

1 mm9 with bowtie2 using the default parameters. The tool MarkDuplicates  
2 (<http://broadinstitute.github.io/picard/>) was used to remove ChIP-seq reads with the same  
3 start site and orientation. RNA-seq reads were similarly trimmed and then aligned to hg19 or  
4 mm9 with STAR using the default parameters. Genome browser profiles were created by  
5 extending each read to the average library fragment size and then computing density using the  
6 BEDTools suite (<http://bedtools.readthedocs.io>). Raw count tables for all transcripts were  
7 created using HTSeq v0.6.1. Expression dynamics were evaluated with DESeq2 using default  
8 library size factor normalization. The resulting log<sub>2</sub> fold changes were then used as input for  
9 GSEA using the 'preranked' option.

10

11 **Quantification and statistical analyses.** Error bars in all data shown represent standard  
12 deviation. Determination of statistical significance was calculated using a Student's t test or  
13 one-way ANOVA using Prism 7 software (GraphPad).

# Figure 1

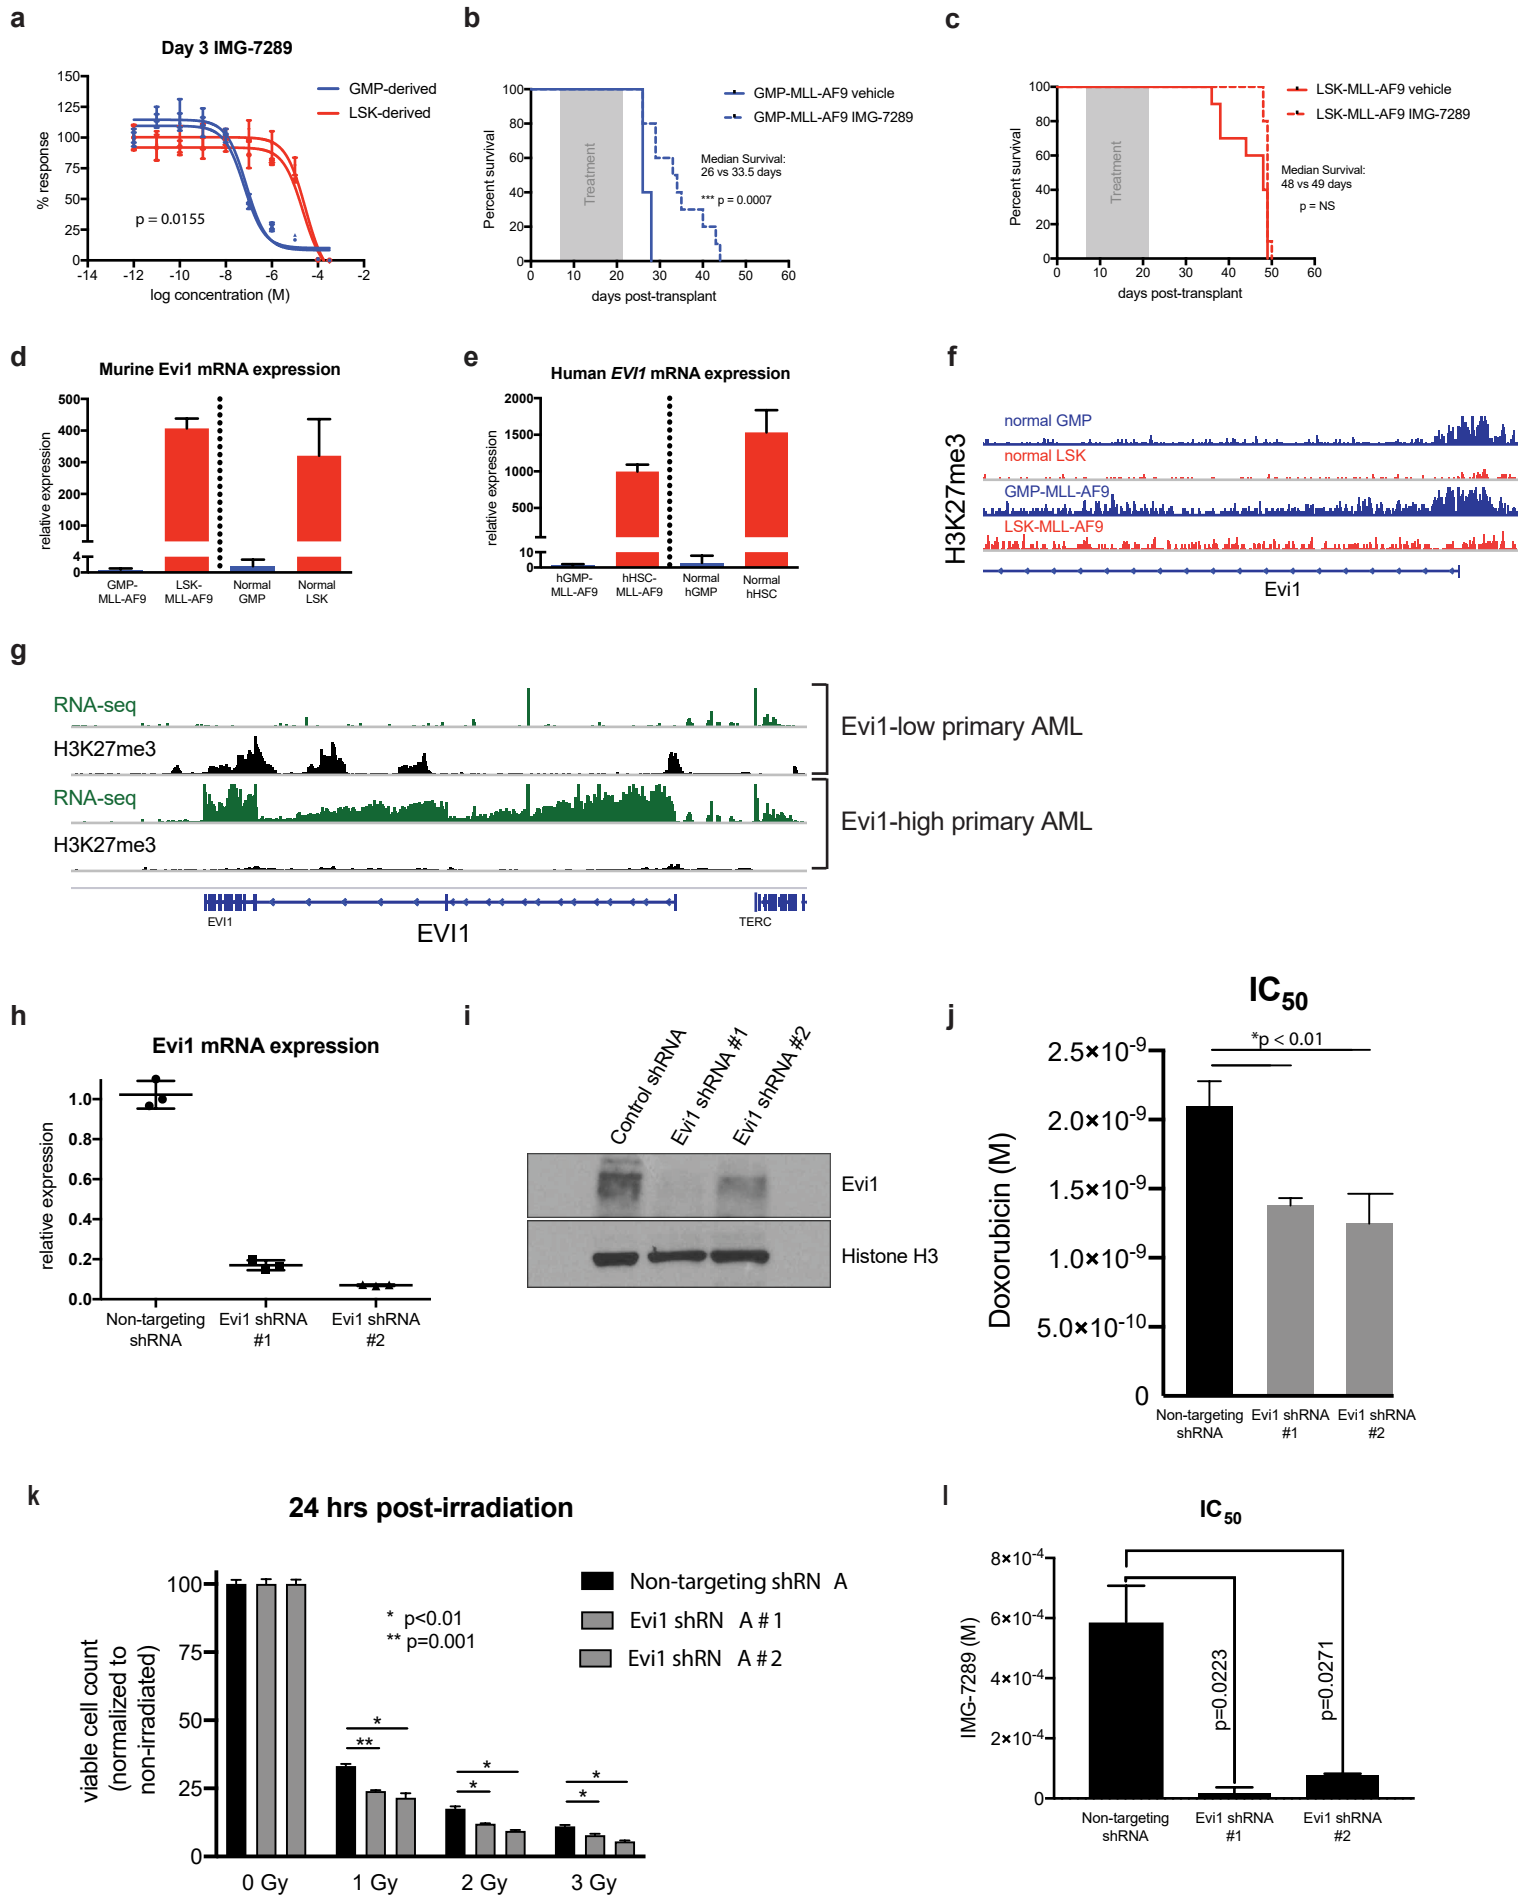



## Figure 2

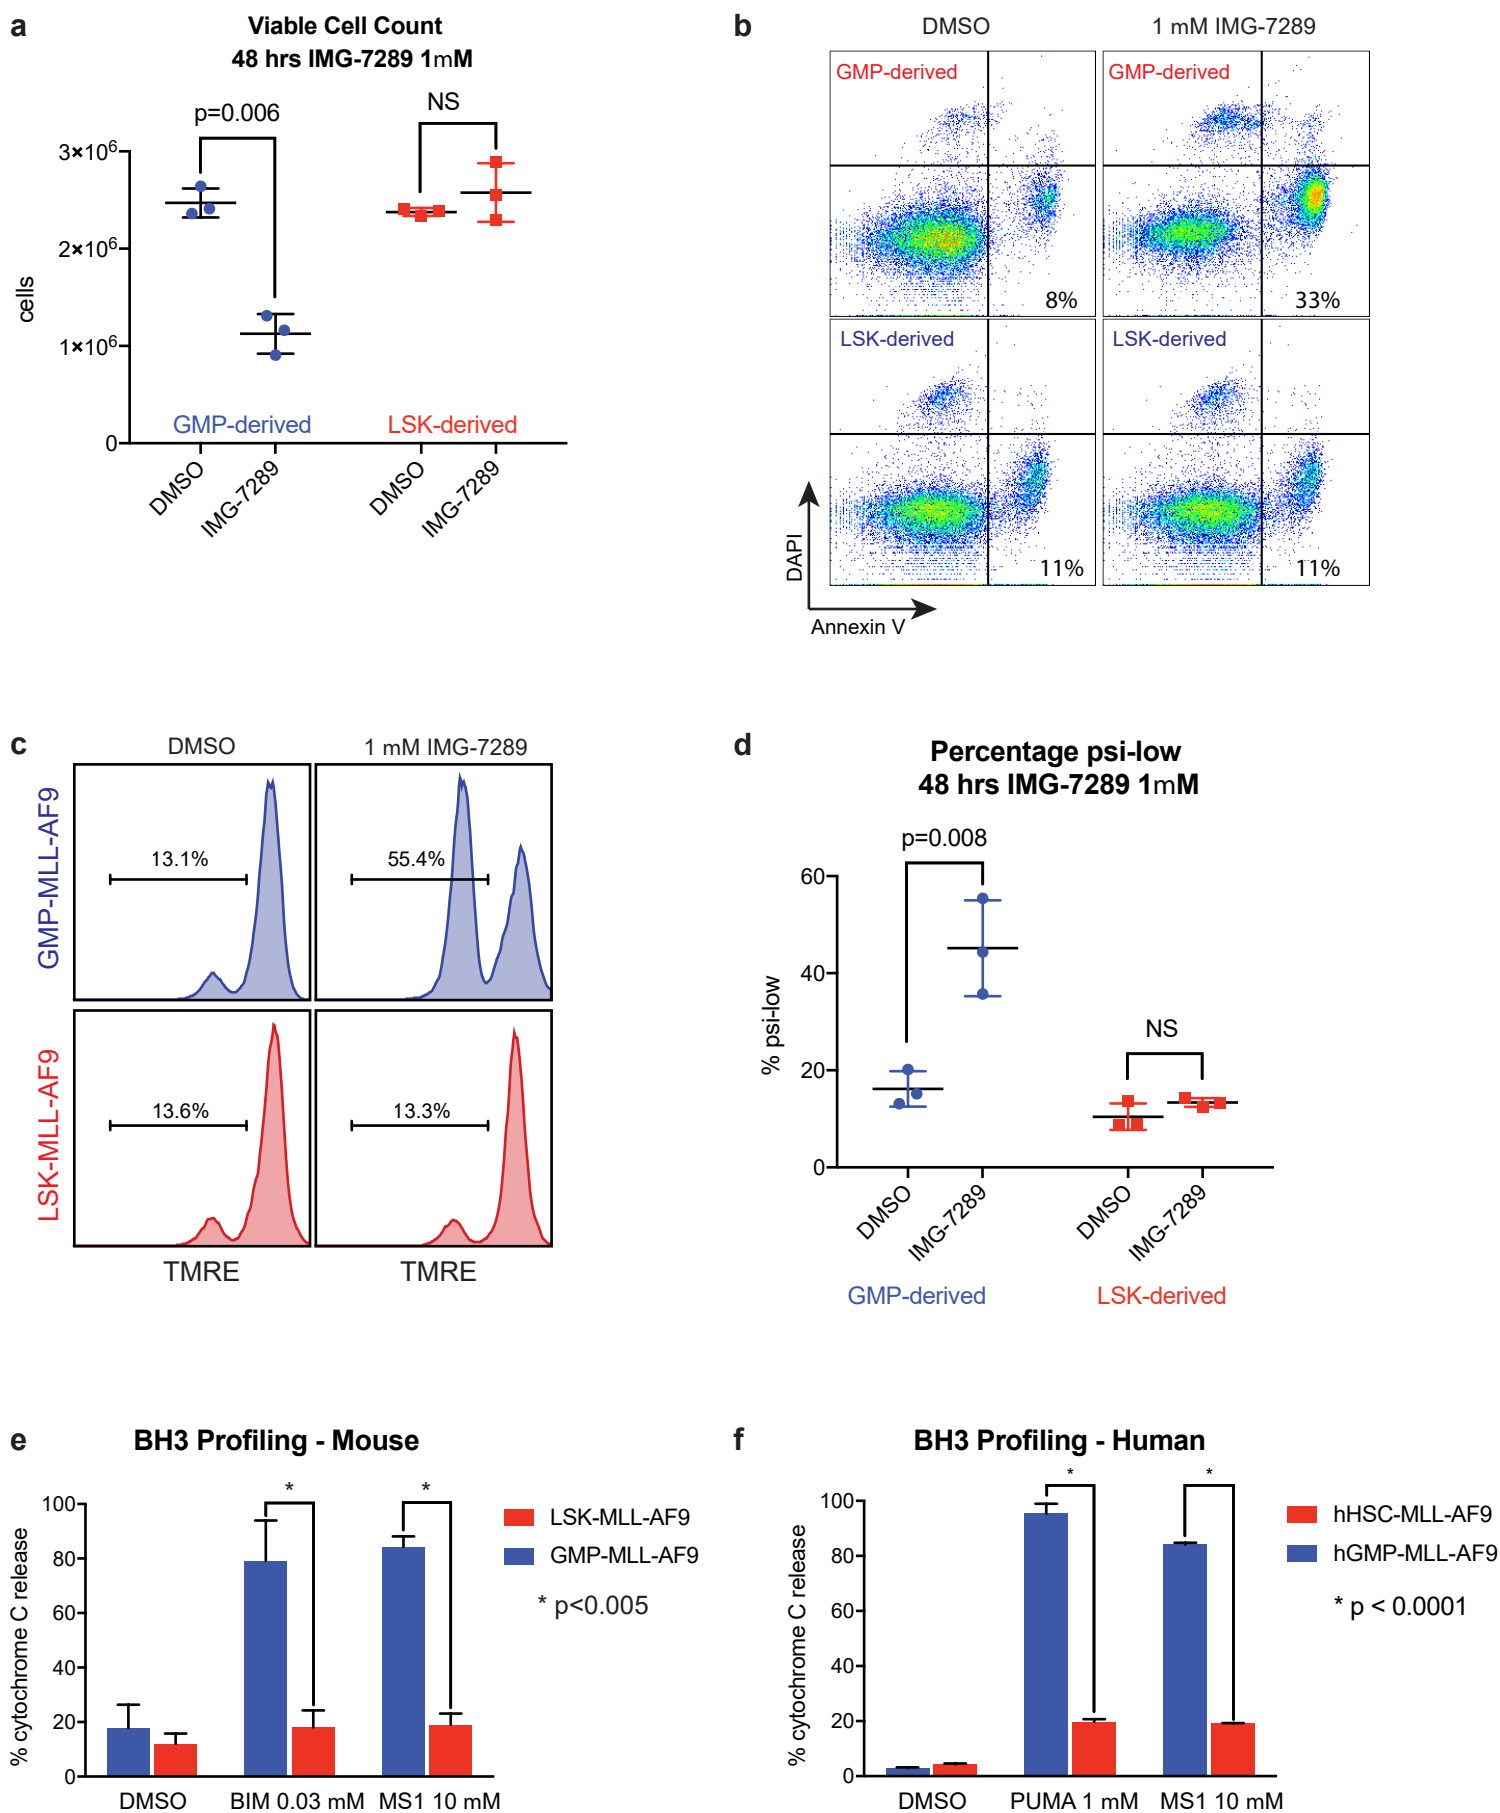

# Figure 3

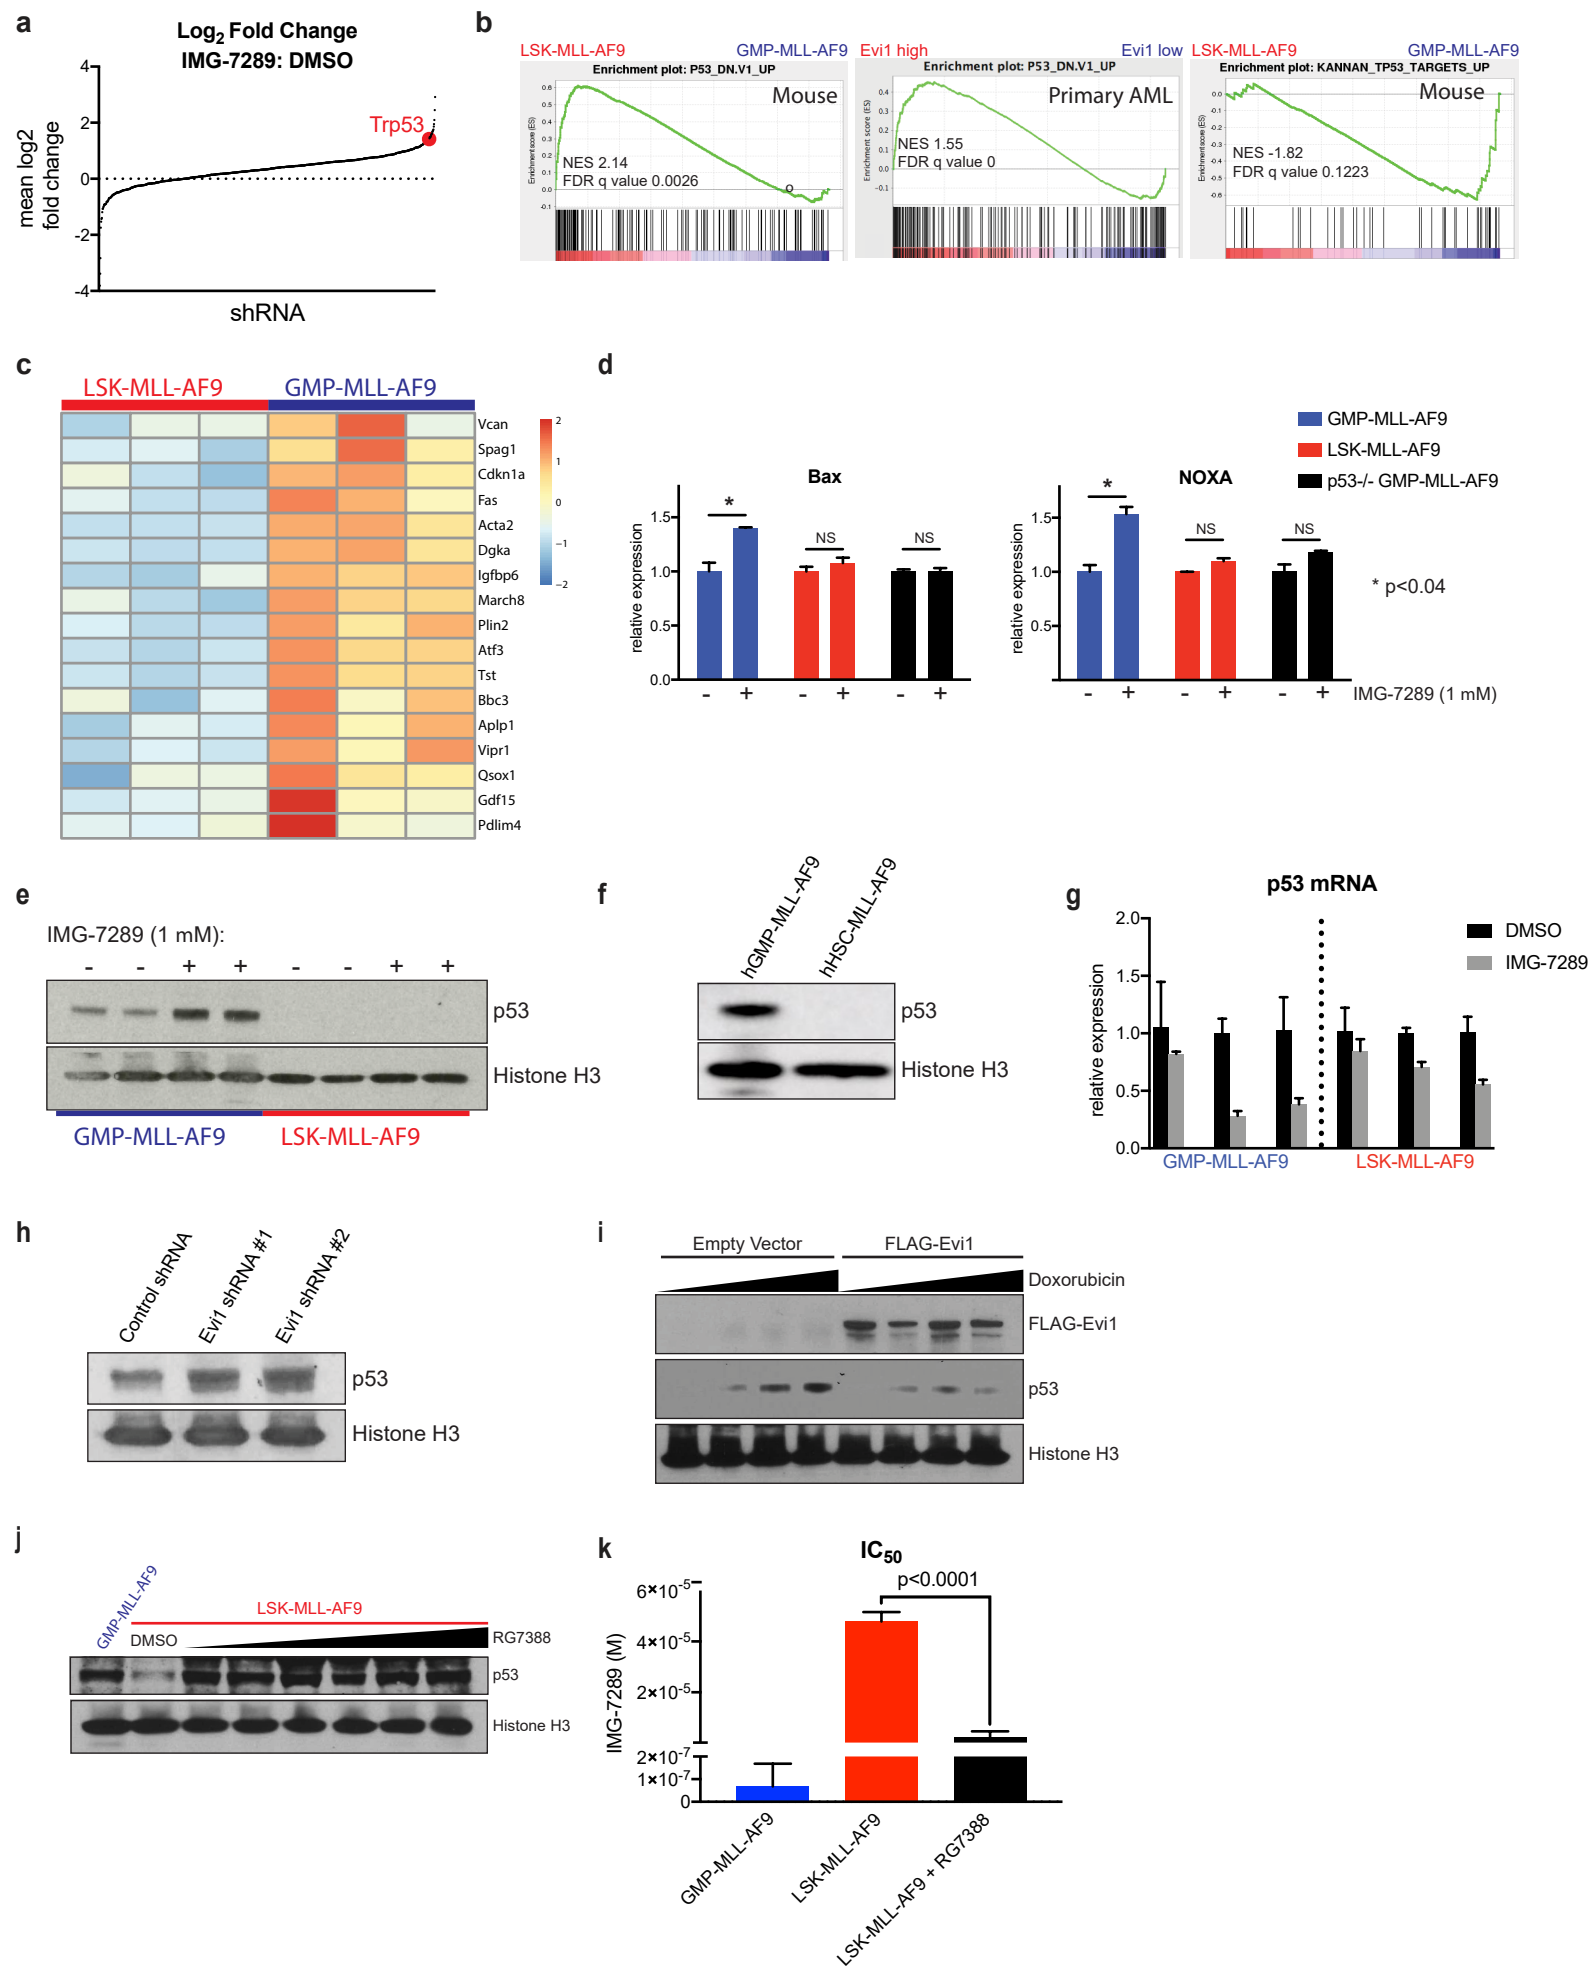

# Figure 4

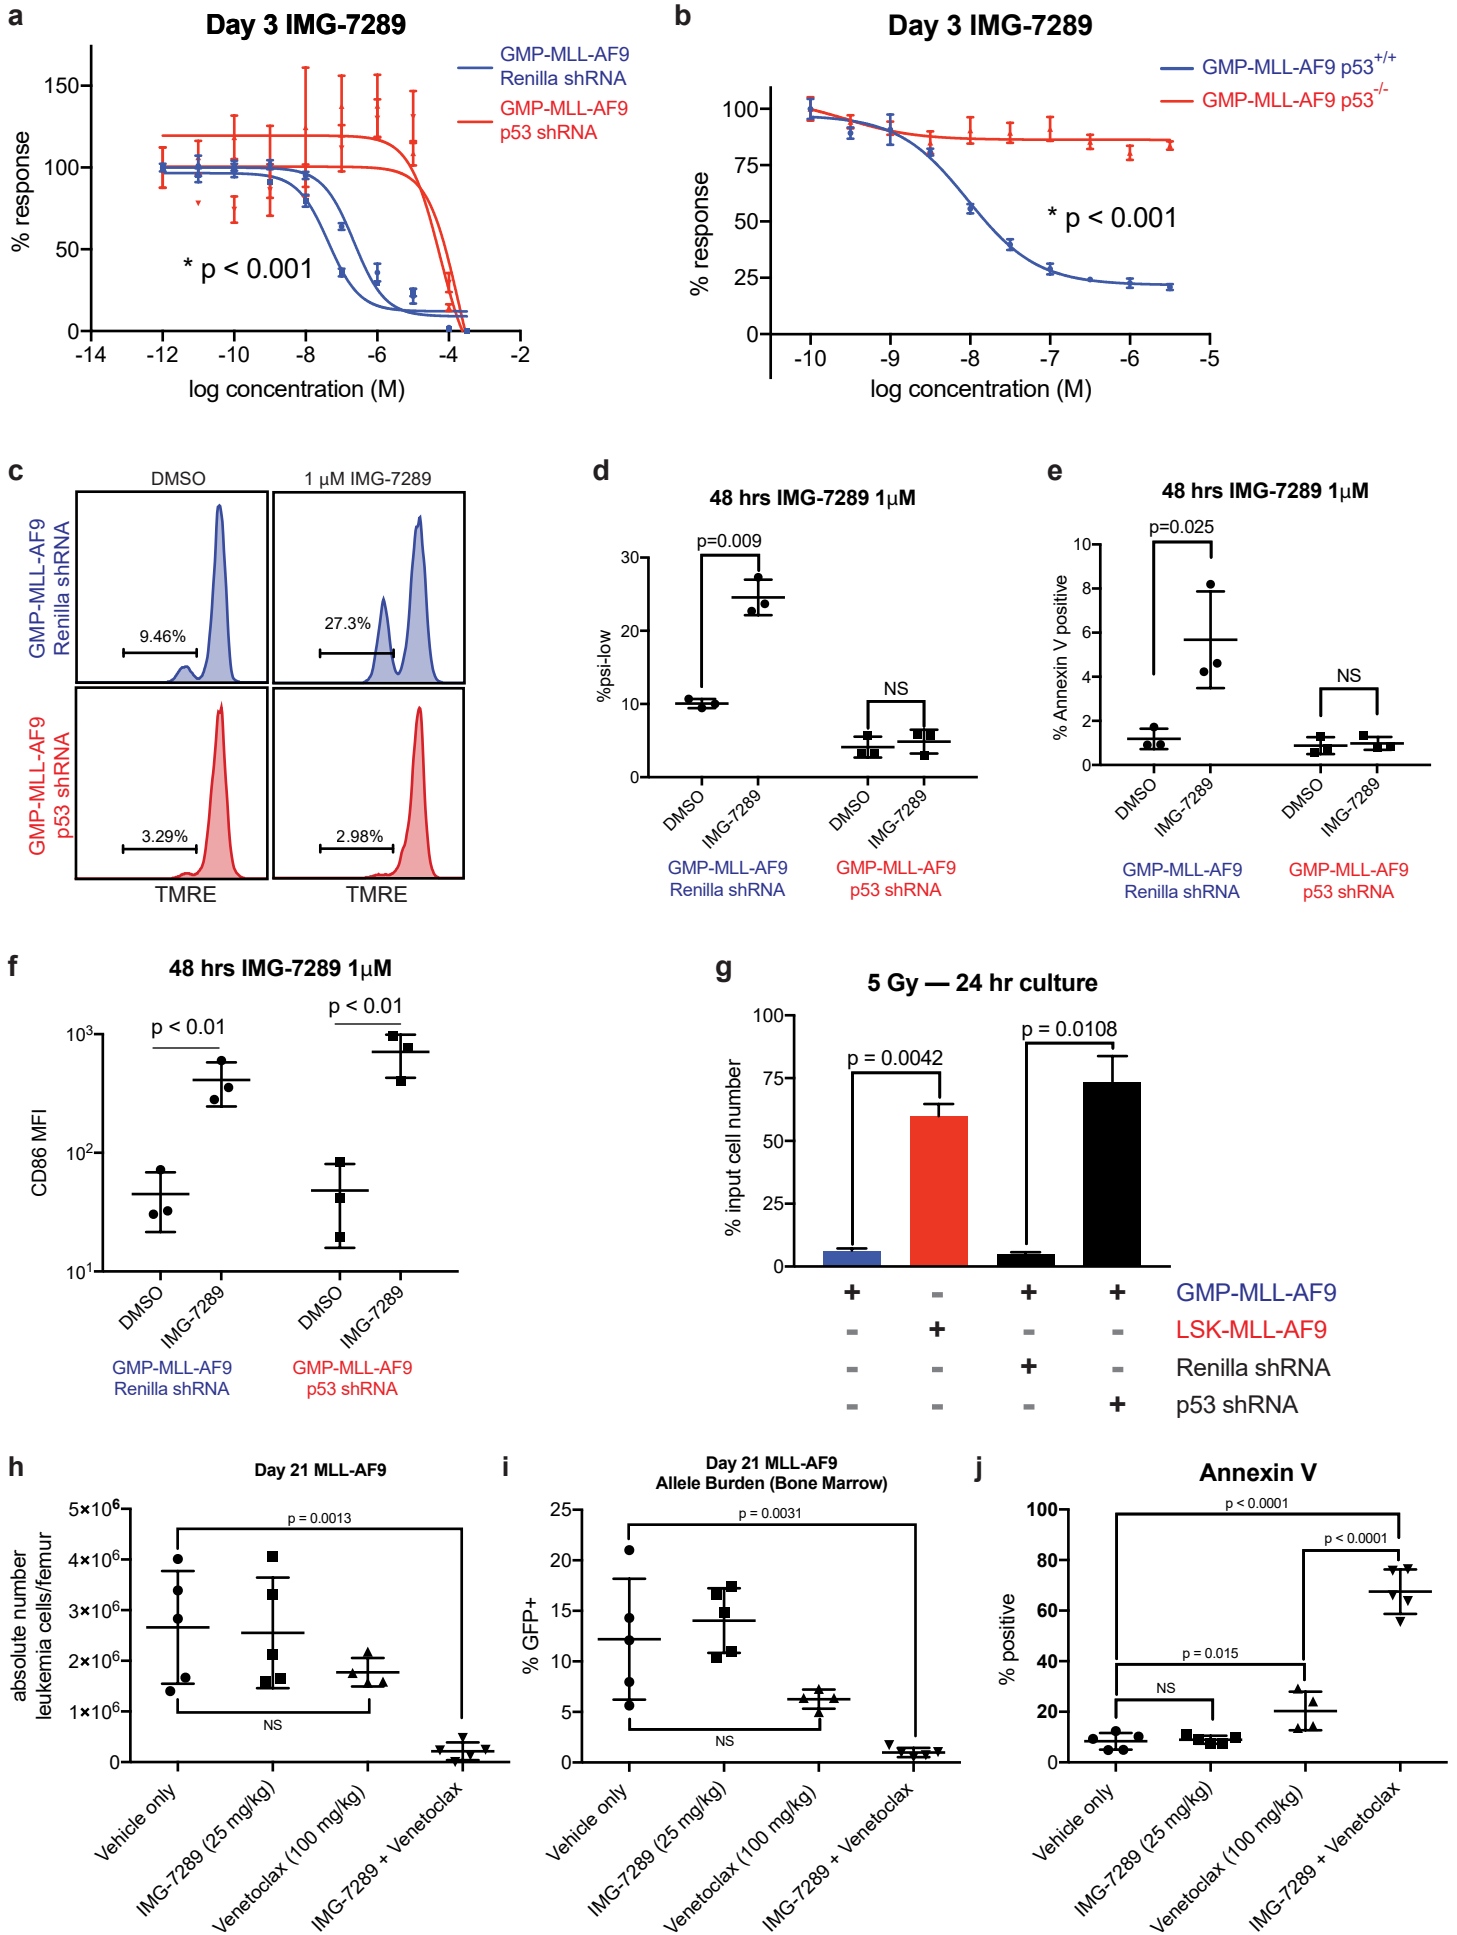

Source: https://www.biorxiv.org/content/biorxiv/early/2020/05/13/2020.05.11.089060.full.pdf
